# Supplementary material for: Composition, richness and nestedness of gallery forest bird assemblages in an Amazonian savanna landscape: lessons for conservation
Source: PeerJ journal article supplement (doi:10.7717/peerj.12529), 2021-12-01
Supplement: SI.pdf [file SI.pdf]

## Supplemental material

Composition, richness and nestedness of gallery forest bird assemblages in an Amazonian savanna landscape: lessons for conservation

Joandro Pandilha<sup>1</sup>, José Júlio Toledo<sup>1</sup>, Luis Claudio Fernandes Barbosa<sup>2</sup>, William Douglas de Carvalho<sup>3</sup>, Jackson Cleiton de Sousa<sup>1</sup> & José Maria Cardoso da Silva<sup>4</sup>

<sup>1</sup> Universidade Federal do Amapá, Programa de Pós-Graduação em Biodiversidade Tropical, Campus Universitário Marco Zero do Equador, Rodovia Juscelino Kubitschek, km 02, Bloco T, Bairro Universidade, 68903-419, Macapá, AP, Brazil

<sup>2</sup> Conservação Internacional do Brasil, 14 de Abril 1186, Apt 205, 66060-460 Belém, Pará, Brazil.

<sup>3</sup> Universidade Federal da Grande Dourados, Programa de Pós-Graduação em Biodiversidade e Meio Ambiente, Rodovia Dourados/Itahum,, Km12, 79804-970, Dourados, MS, Brazil.

<sup>4</sup> University of Miami, Department of Geography and Sustainable Development, 1300 Campo Sano, Coral Gables, FL, 33124-4401

Contents:

Figure S1

Tables S1-S4

Figure S1: Mean landscape abundance and occupancy of 99 bird species recorded in 26 gallery forests of an Amazonian savanna landscape, Amapá, Brazil.

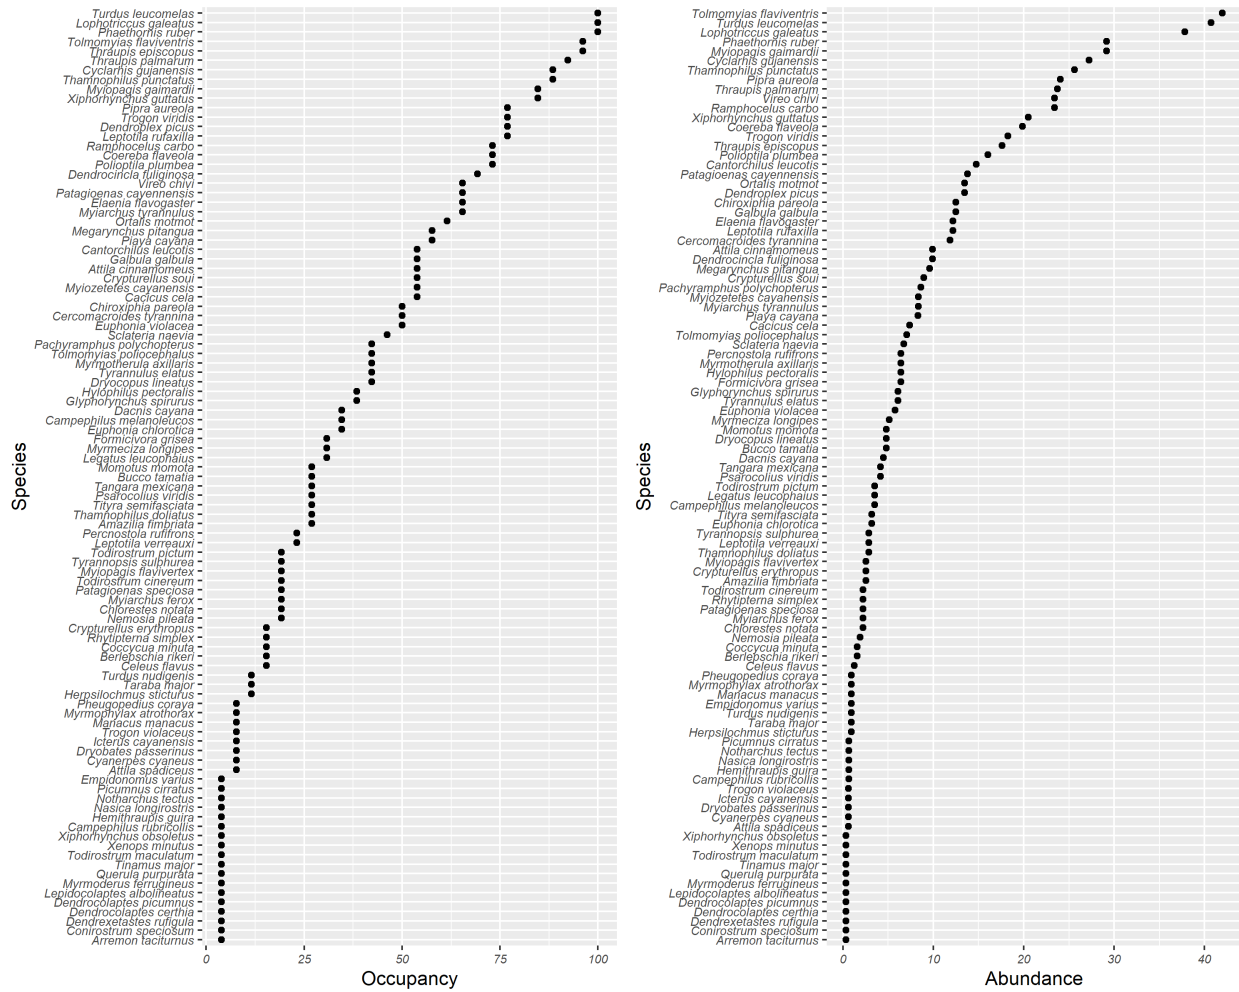

Table S1: Bird species recorded in 26 gallery forests of an Amazonian savanna landscape, Amapá, Brazil, and their respective functional traits. Species that do not have information about functional traits were not well sampled in our surveys and excluded from all statistical analyses.

| Order/Family/Species           | Landscape mean abundance | Occupancy | Body mass (log-transformed) | Trophic groups  | Wing morphology | Dispersal ability | Foraging stratum groups |
|--------------------------------|--------------------------|-----------|-----------------------------|-----------------|-----------------|-------------------|-------------------------|
| Tinamiformes                   |                          |           |                             |                 |                 |                   |                         |
| Tinamidae                      |                          |           |                             |                 |                 |                   |                         |
| <i>Tinamus major</i>           | 0.32                     | 3.8       | 3.05                        | omnivore        | 20.50           | 0.0               | ground                  |
| <i>Crypturellus soui</i>       | 8.97                     | 53.8      | 2.31                        | omnivore        | 26.76           | 25.0              | Ground                  |
| <i>Crypturellus erythropus</i> | 2.56                     | 15.4      | 2.54                        | omnivore        | 30.14           | 0.0               | Ground                  |
| Galliformes                    |                          |           |                             |                 |                 |                   |                         |
| Cracidae                       |                          |           |                             |                 |                 |                   |                         |
| <i>Ortalis motmot</i>          | 13.46                    | 61.5      | 2.70                        | frugivore-seeds | 14.84           | 25.0              | canopy and edges        |
| Columbiformes                  |                          |           |                             |                 |                 |                   |                         |
| Columbidae                     |                          |           |                             |                 |                 |                   |                         |
| <i>Leptotila verreauxi</i>     | 2.88                     | 23.1      | 2.19                        | frugivore-seeds | 21.85           | 62.5              | ground                  |
| <i>Leptotila rufaxilla</i>     | 12.17                    | 76.9      | 2.19                        | frugivore-seeds | 24.39           | 108.3             | canopy and edges        |
| <i>Patagioenas cayennensis</i> | 13.77                    | 65.4      | 2.41                        | frugivore-seeds | 34.06           | 175.0             | canopy and edges        |
| <i>Patagioenas speciosa</i>    | 2.44                     | 19.2      | 2.42                        | frugivore-seeds | 36.51           | 25.0              | canopy and edges        |
| Cuculiformes                   |                          |           |                             |                 |                 |                   |                         |
| Cuculidae                      |                          |           |                             |                 |                 |                   |                         |
| <i>Coccyua minuta</i>          | 1.60                     | 15.4      | 1.48                        | insectivore     | 14.61           | 125.0             | canopy and edges        |
| <i>Piaya cayana</i>            | 8.33                     | 57.7      | 2.07                        | insectivore     | 11.30           | 58.3              | canopy and edges        |
| Caprimulgiformes               |                          |           |                             |                 |                 |                   |                         |
| Trochilidae                    |                          |           |                             |                 |                 |                   |                         |
| <i>Phaethornis ruber</i>       | 29.17                    | 100       | 0.34                        | nectarivore     | 74.80           | 25.0              | understory              |

|                                 |       |      |      |             |       |       |                  |
|---------------------------------|-------|------|------|-------------|-------|-------|------------------|
| <i>Amazilia fimbriata</i>       | 2.56  | 26.9 | 0.63 | nectarivore | 63.00 | 97.2  | mid-level        |
| <i>Chlorestes notata</i>        | 2.24  | 19.2 | 0.60 | nectarivore | 67.02 | 25.0  | mid-level        |
| Trogoniformes                   |       |      |      |             |       |       |                  |
| Trogonidae                      |       |      |      |             |       |       |                  |
| <i>Trogon viridis</i>           | 18.27 | 76.9 | 1.92 | omnivore    | 33.19 | 50.0  | mid-level        |
| <i>Trogon violaceus</i>         | 0.64  | 7.7  | 1.68 | omnivore    | 38.40 | 25.0  | mid-level        |
| Coraciiformes                   |       |      |      |             |       |       |                  |
| Momotidae                       |       |      |      |             |       |       |                  |
| <i>Momotus momota</i>           | 4.81  | 26.9 | 2.09 | insectivore | 18.58 | 0.0   | canopy and edges |
| Galbuliformes                   |       |      |      |             |       |       |                  |
| Bucconidae                      |       |      |      |             |       |       |                  |
| <i>Notharchus tectus</i>        | 0.64  | 3.8  | 1.50 | insectivore | 27.19 | 25.0  | mid-level        |
| <i>Bucco tamatia</i>            | 4.80  | 26.9 | 1.47 | insectivore | 22.39 | 25.0  | mid-level        |
| Galbuliformes                   |       |      |      |             |       |       |                  |
| Galbulidae                      |       |      |      |             |       |       |                  |
| <i>Galbula galbula</i>          | 12.5  | 53.8 | 1.46 | insectivore | 24.60 | 25.0  | mid-level        |
| Piciformes                      |       |      |      |             |       |       |                  |
| Ramphastidae                    |       |      |      |             |       |       |                  |
| <i>Pteroglossus aracari</i>     | -     | -    | -    | -           | -     | -     | -                |
| <i>Ramphastos tucanus</i>       | -     | -    | -    | -           | -     | -     | -                |
| <i>Ramphastos vitellinus</i>    | -     | -    | -    | -           | -     | -     | -                |
| Picidae                         |       |      |      |             |       |       |                  |
| <i>Picumnus cirratus</i>        | 0.64  | 3.8  | 1.00 | insectivore | 11.55 | 25.0  | mid-level        |
| <i>Dryobates passerinus</i>     | 0.64  | 7.7  | 1.48 | insectivore | 15.35 | 200.0 | mid-level        |
| <i>Campephilus rubricollis</i>  | 0.64  | 3.8  | 2.34 | insectivore | 17.73 | 0.0   | mid-level        |
| <i>Campephilus melanoleucos</i> | 3.52  | 34.6 | 2.36 | insectivore | 22.08 | 62.5  | canopy and edges |
| <i>Dryocopus lineatus</i>       | 4.80  | 42.3 | 2.31 | insectivore | 20.46 | 143.8 | canopy and edges |
| <i>Celeus flavus</i>            | 1.28  | 15.4 | 2.30 | insectivore | 19.30 | 0.0   | canopy and edges |

Psittaciformes

Psittacidae

|                                  |   |   |   |   |   |   |   |
|----------------------------------|---|---|---|---|---|---|---|
| <i>Brotogeris sanctithomae</i>   | - | - | - | - | - | - | - |
| <i>Brotogeris versicolurus</i>   | - | - | - | - | - | - | - |
| <i>Graydidascalus brachyurus</i> | - | - | - | - | - | - | - |
| <i>Amazona ochrocephala</i>      | - | - | - | - | - | - | - |
| <i>Amazona amazonica</i>         | - | - | - | - | - | - | - |
| <i>Pyrrhura picta</i>            | - | - | - | - | - | - | - |
| <i>Orthopsittaca manilatus</i>   | - | - | - | - | - | - | - |
| <i>Ara ararauna</i>              | - | - | - | - | - | - | - |
| <i>Ara macao</i>                 | - | - | - | - | - | - | - |
| <i>Ara severus</i>               | - | - | - | - | - | - | - |
| <i>Psittacara leucophthalmus</i> | - | - | - | - | - | - | - |

Passeriformes

Thamnophilidae

|                                 |       |      |      |             |       |      |                  |
|---------------------------------|-------|------|------|-------------|-------|------|------------------|
| <i>Taraba major</i>             | 0.92  | 11.5 | 1.78 | insectivore | 5.18  | 0.0  | understory       |
| <i>Thamnophilus doliatus</i>    | 2.88  | 26.9 | 1.45 | insectivore | 8.99  | 55.0 | understory       |
| <i>Thamnophilus punctatus</i>   | 25.64 | 88.5 | 1.29 | insectivore | 10.06 | 25.0 | understory       |
| <i>Myrmotherula axillaris</i>   | 6.41  | 42.3 | 0.92 | insectivore | 15.21 | 0.0  | understory       |
| <i>Herpsilochmus sticturus</i>  | 0.96  | 11.5 | 1.00 | insectivore | 15.40 | 0.0  | mid-level        |
| <i>Formicivora grisea</i>       | 6.40  | 30.8 | 1.03 | insectivore | 8.15  | 60.7 | canopy and edges |
| <i>Cercomacroides tyrannina</i> | 11.85 | 50.0 | 1.26 | insectivore | 9.29  | 25.0 | understory       |
| <i>Sclateria naevia</i>         | 6.73  | 46.2 | 1.34 | insectivore | 12.75 | 25.0 | understory       |
| <i>Percnostola rufifrons</i>    | 6.41  | 23.1 | 1.46 | insectivore | 15.01 | 25.0 | Understory       |
| <i>Myrmeciza longipes</i>       | 5.13  | 30.8 | 1.34 | insectivore | 6.40  | 25.0 | understory       |
| <i>Myrmoderus ferrugineus</i>   | 0.32  | 3.8  | 1.39 | insectivore | 6.62  | 0.0  | ground           |
| <i>Myrmophylax atrothorax</i>   | 0.96  | 7.7  | 0.90 | insectivore | 13.43 | 0.0  | ground           |

Furnariidae

|                                    |       |       |      |                 |       |      |                  |
|------------------------------------|-------|-------|------|-----------------|-------|------|------------------|
| <i>Dendrocincla fuliginosa</i>     | 9.92  | 69.2  | 1.57 | insectivore     | 18.33 | 0.0  | mid-level        |
| <i>Glyphorhynchus spirurus</i>     | 6.09  | 38.5  | 1.13 | insectivore     | 23.92 | 25.0 | mid-level        |
| <i>Dendrexetastes rufigula</i>     | 0.32  | 3.8   | 1.85 | insectivore     | 14.68 | 0.0  | mid-level        |
| <i>Nasica longirostris</i>         | 0.64  | 3.8   | 1.96 | insectivore     | 18.75 | 0.0  | mid-level        |
| <i>Dendrocolaptes certhia</i>      | 0.32  | 3.8   | 1.83 | insectivore     | 17.81 | 0.0  | mid-level        |
| <i>Dendrocolaptes picumnus</i>     | 0.32  | 3.8   | 1.89 | insectivore     | 17.03 | 0.0  | mid-level        |
| <i>Xiphorhynchus obsoletus</i>     | 0.32  | 3.8   | 1.59 | insectivore     | 18.68 | 0.0  | mid-level        |
| <i>Xiphorhynchus guttatus</i>      | 20.51 | 84.6  | 1.81 | insectivore     | 16.16 | 25.0 | mid-level        |
| <i>Dendroplex picus</i>            | 13.45 | 76.9  | 1.61 | insectivore     | 17.80 | 89.3 | mid-level        |
| <i>Lepidocolaptes albolineatus</i> | 0.32  | 3.8   | 1.43 | insectivore     | 21.72 | 0.0  | canopy and edges |
| <i>Xenops minutus</i>              | 0.32  | 3.8   | 1.08 | insectivore     | 21.97 | 0.0  | mid-level        |
| <i>Berlepschia rikeri</i>          | 1.60  | 15.4  | 1.48 | insectivore     | 31.73 | 0.0  | canopy and edges |
| Pipridae                           |       |       |      |                 |       |      |                  |
| <i>Chiroxiphia pareola</i>         | 12.51 | 50.0  | 1.29 | frugivore-seeds | 10.37 | 25.0 | understory       |
| <i>Manacus manacus</i>             | 0.96  | 7.7   | 1.06 | frugivore-seeds | 15.70 | 25.0 | canopy and edges |
| <i>Pipra aureola</i>               | 24.03 | 76.9  | 1.18 | frugivore-seeds | 19.31 | 25.0 | Understory       |
| Cotingidae                         |       |       |      |                 |       |      |                  |
| <i>Querula purpurata</i>           | 0.32  | 3.8   | 2.10 | omnivore        | 17.98 | 0.0  | mid-level        |
| Tityridae                          |       |       |      |                 |       |      |                  |
| <i>Tityra semifasciata</i>         | 3.20  | 26.9  | 1.94 | omnivore        | 25.71 | 0.0  | canopy and edges |
| <i>Pachyramphus polychopterus</i>  | 8.65  | 42.3  | 1.31 | omnivore        | 20.82 | 55.8 | canopy and edges |
| Tyrannidae                         |       |       |      |                 |       |      |                  |
| <i>Lophotriccus galeatus</i>       | 37.82 | 100.0 | 1.00 | insectivore     | 17.25 | 30.6 | mid-level        |
| <i>Todirostrum maculatum</i>       | 0.32  | 3.8   | 0.88 | insectivore     | 13.82 | 25.0 | canopy and edges |
| <i>Todirostrum cinereum</i>        | 2.24  | 19.2  | 0.85 | insectivore     | 16.65 | 41.7 | canopy and edges |
| <i>Todirostrum pictum</i>          | 3.52  | 19.2  | 0.85 | insectivore     | 15.14 | 25.0 | canopy and edges |
| <i>Tolmomyias poliocephalus</i>    | 7.05  | 42.3  | 1.04 | insectivore     | 14.86 | 25.0 | canopy and edges |
| <i>Tolmomyias flaviventris</i>     | 41.98 | 96.2  | 1.15 | insectivore     | 16.21 | 48.7 | canopy and edges |

|                               |       |       |      |                 |       |       |                  |
|-------------------------------|-------|-------|------|-----------------|-------|-------|------------------|
| <i>Tyrannulus elatus</i>      | 6.09  | 42.3  | 0.86 | insectivore     | 19.10 | 25.0  | canopy and edges |
| <i>Myiopagis gaimardii</i>    | 29.17 | 84.6  | 1.10 | insectivore     | 18.36 | 54.5  | mid-level        |
| <i>Myiopagis flavivertex</i>  | 2.56  | 19.2  | 1.04 | insectivore     | 17.44 | 25.0  | canopy and edges |
| <i>Elaenia flavogaster</i>    | 12.18 | 64.4  | 1.30 | omnivore        | 14.91 | 124.0 | canopy and edges |
| <i>Attila cinnamomeus</i>     | 9.93  | 53.8  | 1.52 | omnivore        | 9.04  | 25.0  | mid-level        |
| <i>Attila spadiceus</i>       | 0.64  | 7.7   | 1.54 | omnivore        | 14.75 | 75.0  | mid-level        |
| <i>Rhytipterna simplex</i>    | 2.24  | 15.4  | 1.53 | insectivore     | 16.73 | 25.0  | mid-level        |
| <i>Myiarchus ferox</i>        | 2.24  | 19.2  | 1.38 | omnivore        | 11.98 | 135.0 | canopy and edges |
| <i>Myiarchus tyrannulus</i>   | 8.33  | 65.4  | 1.42 | insectivore     | 14.06 | 145.0 | canopy and edges |
| <i>Megarynchus pitangua</i>   | 9.61  | 57.7  | 1.78 | insectivore     | 22.67 | 65.0  | canopy and edges |
| <i>Myiozetetes cayanensis</i> | 8.33  | 53.8  | 1.62 | insectivore     | 15.42 | 50.0  | canopy and edges |
| <i>Legatus leucophaeus</i>    | 3.52  | 30.8  | 1.39 | frugivore-seeds | 25.44 | 25.0  | canopy and edges |
| <i>Empidonomus varius</i>     | 0.96  | 3.8   | 1.42 | Insectivore     | 20.82 | 50.0  | canopy and edges |
| <i>Tyrannopsis sulphurea</i>  | 2.88  | 19.2  | 1.48 | insectivore     | 16.27 | 25.00 | mid-level        |
| Vireonidae                    |       |       |      |                 |       |       |                  |
| <i>Cyclarhis gujanensis</i>   | 27.24 | 88.5  | 1.45 | omnivore        | 17.93 | 57.7  | canopy and edges |
| <i>Hylophilus pectoralis</i>  | 6.41  | 38.5  | 1.04 | insectivore     | 13.86 | 46.4  | canopy and edges |
| <i>Vireo chivi</i>            | 23.40 | 65.4  | 1.18 | omnivore        | 24.08 | 29.5  | canopy and edges |
| Poliophtilidae                |       |       |      |                 |       |       |                  |
| <i>Poliophtila plumbea</i>    | 16.0  | 73.1  | 0.78 | insectivore     | 12.33 | 76.4  | canopy and edges |
| Troglodytidae                 |       |       |      |                 |       |       |                  |
| <i>Pheugopedius coraya</i>    | 0.96  | 7.7   | 1.22 | insectivore     | 11.56 | 0.0   | Understory       |
| <i>Cantorchilus leucotis</i>  | 14.75 | 53.8  | 1.20 | insectivore     | 12.18 | 25.0  | understory       |
| Turdidae                      |       |       |      |                 |       |       |                  |
| <i>Turdus leucomelas</i>      | 40.71 | 100.0 | 1.83 | omnivore        | 22.52 | 65.6  | canopy and edges |
| <i>Turdus nudigenis</i>       | 0.96  | 11.5  | 1.81 | omnivore        | 20.01 | 0.0   | canopy and edges |
| Fringillidae                  |       |       |      |                 |       |       |                  |
| <i>Euphonia chlorotica</i>    | 3.20  | 34.6  | 0.90 | frugivore-seeds | 23.22 | 41.7  | canopy and edges |

|                              |       |      |      |                 |       |       |                  |
|------------------------------|-------|------|------|-----------------|-------|-------|------------------|
| <i>Euphonia violacea</i>     | 5.76  | 50.0 | 1.15 | frugivore-seeds | 28.07 | 87.5  | canopy and edges |
| Passerellidae                |       |      |      |                 |       |       |                  |
| <i>Arremon taciturnus</i>    | 0.32  | 3.8  | 1.45 | omnivore        | 10.87 | 0.0   | Ground           |
| Icteridae                    |       |      |      |                 |       |       |                  |
| <i>Psarocolius viridis</i>   | 4.17  | 26.9 | 2.48 | insectivore     | 23.43 | 25.0  | canopy and edges |
| <i>Cacicus cela</i>          | 7.37  | 53.8 | 1.93 | omnivore        | 27.53 | 55.0  | canopy and edges |
| <i>Icterus cayanensis</i>    | 0.64  | 7.7  | 1.62 | insectivore     | 15.45 | 25.0  | canopy and edges |
| Thraupidae                   |       |      |      |                 |       |       |                  |
| <i>Nemosia pileata</i>       | 1.92  | 19.2 | 1.15 | insectivore     | 20.17 | 75.0  | canopy and edges |
| <i>Ramphocelus carbo</i>     | 23.40 | 73.1 | 1.39 | omnivore        | 17.36 | 58.3  | canopy and edges |
| <i>Thraupis episcopus</i>    | 17.63 | 96.2 | 1.54 | omnivore        | 22.94 | 86.1  | canopy and edges |
| <i>Thraupis palmarum</i>     | 23.72 | 92.3 | 1.59 | omnivore        | 21.07 | 97.2  | canopy and edges |
| <i>Tangara mexicana</i>      | 4.17  | 26.9 | 1.28 | omnivore        | 22.06 | 65.0  | canopy and edges |
| <i>Dacnis cayana</i>         | 4.48  | 34.6 | 1.11 | omnivore        | 24.41 | 58.3  | canopy and edges |
| <i>Cyanerpes cyaneus</i>     | 0.64  | 7.7  | 1.14 | frugivore-seeds | 27.05 | 0.0   | canopy and edges |
| <i>Hemithraupis guira</i>    | 0.64  | 3.8  | 1.00 | insectivore     | 22.56 | 0.0   | canopy and edges |
| <i>Conirostrum speciosum</i> | 0.32  | 3.8  | 0.95 | insectivore     | 22.80 | 175.0 | canopy and edges |
| <i>Coereba flaveola</i>      | 19.88 | 73.1 | 0.97 | nectarivore     | 19.30 | 70.6  | canopy and edges |



Table S2: Results of model selection from phylogenetic generalized least squares models relating species functional traits with the landscape mean abundance of 99 bird species recorded in 26 gallery forests of an Amazonian savanna landscape, Amapá, Brazil. Models are ranked according to their AICc. Sample-size adjusted AIC (AICc), Akaike differences ( $\Delta_i$ ) and Akaike weights ( $w_i$ ) are given

| Model | Intercept | Wing morphology | Canopy and Edge | Ground | Habitat specificity | Body mass | Midstory | df | logLik   | AICc  | $\Delta_i$ | $w_i$ |
|-------|-----------|-----------------|-----------------|--------|---------------------|-----------|----------|----|----------|-------|------------|-------|
| 11    | 6.801     |                 | -3.866          |        | 0.072               |           |          | 3  | -369.512 | 745.3 | 0          | 0.094 |
| 15    | 8.792     |                 | -4.581          | -6.534 | 0.068               |           |          | 4  | -368.519 | 745.5 | 0.19       | 0.085 |
| 9     | 5.608     |                 |                 |        | 0.063               |           |          | 2  | -370.858 | 745.8 | 0.56       | 0.071 |
| 31    | 3.274     |                 | -4.908          | -6.924 | 0.070               | 3.174     |          | 5  | -367.936 | 746.5 | 1.24       | 0.05  |
| 27    | 1.778     |                 | -4.12           |        | 0.074               | 2.829     |          | 4  | -369.057 | 746.5 | 1.26       | 0.05  |
| 47    | 11.55     |                 | -7.709          | -8.507 | 0.069               |           | -4.148   | 5  | -368.027 | 746.7 | 1.42       | 0.046 |
| 12    | 3.324     | 0.124           | -4.117          |        | 0.073               |           |          | 4  | -369.174 | 746.8 | 1.5        | 0.044 |
| 41    | 4.818     |                 |                 |        | 0.066               |           | 2.608    | 3  | -370.338 | 746.9 | 1.65       | 0.041 |
| 13    | 6.866     |                 |                 | -4.642 | 0.059               |           |          | 3  | -370.349 | 747   | 1.67       | 0.041 |
| 16    | 5.992     | 0.095           | -4.726          | -6.107 | 0.069               |           |          | 5  | -368.32  | 747.3 | 2.01       | 0.034 |
| 43    | 7.492     |                 | -4.801          |        | 0.073               |           | -1.331   | 4  | -369.454 | 747.3 | 2.06       | 0.034 |
| 25    | 1.565     |                 |                 |        | 0.064               | 2.242     |          | 3  | -370.576 | 747.4 | 2.13       | 0.032 |
| 10    | 3.029     | 0.090           |                 |        | 0.063               |           |          | 3  | -370.682 | 747.6 | 2.34       | 0.029 |
| 28    | -3.897    | 0.161           | -4.504          |        | 0.076               | 3.486     |          | 5  | -368.506 | 747.7 | 2.38       | 0.028 |
| 63    | 6.119     |                 | -7.874          | -8.786 | 0.071               | 3.047     | -3.95    | 6  | -367.486 | 747.9 | 2.61       | 0.025 |

|            |         |       |        |        |       |       |        |   |          |       |      |       |
|------------|---------|-------|--------|--------|-------|-------|--------|---|----------|-------|------|-------|
| 32         | -1.528  | 0.133 | -5.164 | -6.391 | 0.072 | 3.69  |        | 6 | -367.559 | 748   | 2.75 | 0.024 |
| 45         | 6.035   |       |        | -4.25  | 0.062 |       | 2.393  | 4 | -369.911 | 748.2 | 2.97 | 0.021 |
| 57         | -0.1326 |       |        |        | 0.068 | 2.694 | 2.916  | 4 | -369.934 | 748.3 | 3.02 | 0.021 |
| 29         | 2.582   |       |        | -4.834 | 0.060 | 2.405 |        | 4 | -370.022 | 748.5 | 3.19 | 0.019 |
| 48         | 8.699   | 0.098 | -7.897 | -8.091 | 0.070 |       | -4.199 | 6 | -367.814 | 748.5 | 3.26 | 0.018 |
| 42         | 1.986   | 0.098 |        |        | 0.066 |       | 2.691  | 4 | -370.128 | 748.7 | 3.4  | 0.017 |
| 59         | 2.437   |       | -4.864 |        | 0.075 | 2.77  | -1.067 | 5 | -369.019 | 748.7 | 3.41 | 0.017 |
| 44         | 4.015   | 0.129 | -5.234 |        | 0.074 |       | -1.578 | 5 | -369.092 | 748.8 | 3.55 | 0.016 |
| 14         | 4.878   | 0.066 |        | -4.303 | 0.059 |       |        | 4 | -370.256 | 748.9 | 3.66 | 0.015 |
| 26         | -2.535  | 0.116 |        |        | 0.065 | 2.675 |        | 4 | -370.293 | 749   | 3.73 | 0.014 |
| 64         | 1.292   | 0.134 | -8.159 | -8.264 | 0.073 | 3.567 | -3.985 | 7 | -367.097 | 749.4 | 4.15 | 0.012 |
| 61         | 0.9205  |       |        | -4.423 | 0.064 | 2.81  | 2.705  | 5 | -369.468 | 749.6 | 4.3  | 0.011 |
| 58         | -4.834  | 0.130 |        |        | 0.069 | 3.207 | 3.084  | 5 | -369.574 | 749.8 | 4.52 | 0.01  |
| 60         | -3.194  | 0.164 | -5.431 |        | 0.077 | 3.425 | -1.319 | 6 | -368.448 | 749.8 | 4.53 | 0.01  |
| 46         | 3.723   | 0.076 |        | -3.847 | 0.063 |       | 2.477  | 5 | -369.788 | 750.2 | 4.94 | 0.008 |
| 30         | -0.7699 | 0.092 |        | -4.389 | 0.061 | 2.734 |        | 5 | -369.847 | 750.3 | 5.06 | 0.007 |
| Null model | 8.247   |       |        |        |       |       |        | 1 | -374.453 | 750.9 | 5.67 | 0.005 |
| 5          | 9.807   |       |        | -6.678 |       |       |        | 2 | -373.438 | 751   | 5.72 | 0.005 |
| 62         | -3.117  | 0.108 |        | -3.876 | 0.065 | 3.222 | 2.87   | 6 | -369.225 | 751.4 | 6.09 | 0.004 |
| 7          | 11.46   |       | -3.181 | -8.212 |       |       |        | 3 | -372.581 | 751.4 | 6.14 | 0.004 |

|    |       |       |        |        |       |         |          |          |          |       |       |       |
|----|-------|-------|--------|--------|-------|---------|----------|----------|----------|-------|-------|-------|
| 3  | 9.127 |       | -2.16  |        |       | 2       | -374.043 | 752.2    | 6.93     | 0.003 |       |       |
| 33 | 7.822 |       |        |        | 1.673 | 2       | -374.252 | 752.6    | 7.35     | 0.002 |       |       |
| 21 | 6.483 |       | -6.864 |        | 1.893 | 3       | -373.247 | 752.7    | 7.47     | 0.002 |       |       |
| 17 | 5.396 |       |        |        | 1.603 | 2       | -374.318 | 752.8    | 7.48     | 0.002 |       |       |
| 2  | 6.103 | 0.075 |        |        |       | 2       | -374.338 | 752.8    | 7.52     | 0.002 |       |       |
| 37 | 9.404 |       | -6.508 |        | 1.431 | 3       | -373.288 | 752.8    | 7.55     | 0.002 |       |       |
| 39 | 13.96 |       | -5.967 | -9.996 |       | -3.714  | 4        | -372.218 | 752.9    | 7.58  | 0.002 |       |
| 23 | 7.418 |       | -3.389 | -8.545 |       | 2.365   | 4        | -372.281 | 753      | 7.71  | 0.002 |       |
| 6  | 8.6   | 0.041 |        | -6.483 |       |         | 3        | -373.404 | 753.1    | 7.78  | 0.002 |       |
| 8  | 9.786 | 0.058 | -3.254 | -7.97  |       |         | 4        | -372.513 | 753.5    | 8.17  | 0.002 |       |
| 19 | 5.849 |       | -2.293 |        |       | 1.874   | 3        | -373.859 | 754      | 8.69  | 0.001 |       |
| 4  | 6.541 | 0.093 | -2.326 |        |       |         | 3        | -373.868 | 754      | 8.71  | 0.001 |       |
| 35 | 9.31  |       | -2.395 |        |       | -0.3404 | 3        | -374.04  | 754.3    | 9.05  | 0.001 |       |
| 49 | 4.448 |       |        |        | 1.869 | 1.867   | 3        | -374.07  | 754.4    | 9.12  | 0.001 |       |
| 34 | 5.53  | 0.080 |        |        |       | 1.733   | 3        | -374.122 | 754.5    | 9.22  | 0.001 |       |
| 53 | 5.621 |       | -6.691 |        | 2.121 | 1.644   | 4        | -373.051 | 754.5    | 9.25  | 0.001 |       |
| 55 | 10.02 |       | -6.048 | -10.24 |       | 2.243   | -3.558   | 5        | -371.947 | 754.5 | 9.26  | 0.001 |
| 18 | 2.114 | 0.094 |        |        |       | 1.947   |          | 3        | -374.146 | 754.5 | 9.27  | 0.001 |
| 22 | 4.336 | 0.060 |        | -6.597 |       | 2.103   |          | 4        | -373.176 | 754.8 | 9.5   | 0.001 |
| 38 | 8.037 | 0.046 |        | -6.284 |       |         | 1.474    | 4        | -373.246 | 754.9 | 9.64  | 0.001 |

|    |        |       |        |        |       |         |   |          |       |       |       |
|----|--------|-------|--------|--------|-------|---------|---|----------|-------|-------|-------|
| 24 | 4.458  | 0.084 | -3.523 | -8.238 | 2.676 |         | 5 | -372.142 | 754.9 | 9.65  | 0.001 |
| 40 | 12.24  | 0.060 | -6.063 | -9.758 |       | -3.741  | 5 | -372.144 | 754.9 | 9.66  | 0.001 |
| 20 | 1.804  | 0.117 | -2.533 |        | 2.332 |         | 4 | -373.593 | 755.6 | 10.33 | 0.001 |
| 51 | 5.941  |       | -2.391 |        | 1.865 | -0.143  | 4 | -373.859 | 756.1 | 10.87 | 0     |
| 36 | 6.775  | 0.095 | -2.68  |        |       | -0.508  | 4 | -373.86  | 756.1 | 10.87 | 0     |
| 50 | 0.8167 | 0.102 |        |        | 2.261 | 1.984   | 4 | -373.866 | 756.2 | 10.88 | 0     |
| 56 | 7.039  | 0.085 | -6.194 | -9.934 | 2.557 | -3.573  | 6 | -371.804 | 756.5 | 11.24 | 0     |
| 54 | 3.13   | 0.068 |        | -6.378 | 2.371 | 1.733   | 5 | -372.959 | 756.6 | 11.29 | 0     |
| 52 | 1.977  | 0.118 | -2.743 |        | 2.316 | -0.3038 | 5 | -373.59  | 757.8 | 12.55 | 0     |

---

Table S3: Results of model selection from phylogenetic generalized least squares models relating species functional traits with the occupancy of 99 bird species recorded in 26 gallery forests of an Amazonian savanna landscape, Amapá, Brazil. Models are ranked according to their AICc. Sample-size adjusted AIC (AICc), Akaike differences ( $\Delta_i$ ) and Akaike weights ( $w_i$ ) are given.

| Model | Intercept | Wing morphology | Canopy and Edge | Ground | Habitat specificity | Body mass | Midstory | df | logLik   | AIC <sub>c</sub> | $\Delta_i$ | $w_i$ |
|-------|-----------|-----------------|-----------------|--------|---------------------|-----------|----------|----|----------|------------------|------------|-------|
| 13    | 34.01     |                 |                 | -22.75 | 0.249               |           |          | 3  | -480.161 | 966.6            | 0          | 0.106 |
| 9     | 27.84     |                 |                 |        | 0.270               |           |          | 2  | -481.479 | 967.1            | 0.51       | 0.082 |
| 29    | 13.63     |                 |                 | -23.66 | 0.255               | 11.44     |          | 4  | -479.353 | 967.1            | 0.56       | 0.08  |
| 47    | 50.3      |                 | -21.35          | -35.02 | 0.264               |           | -21.08   | 5  | -478.532 | 967.7            | 1.13       | 0.06  |
| 25    | 8.652     |                 |                 |        | 0.276               | 10.64     |          | 3  | -480.797 | 967.8            | 1.27       | 0.056 |
| 15    | 36.3      |                 | -5.456          | -25    | 0.260               |           |          | 4  | -479.883 | 968.2            | 1.62       | 0.047 |
| 63    | 29.21     |                 | -21.99          | -36.11 | 0.273               | 11.84     | -20.31   | 6  | -477.653 | 968.2            | 1.64       | 0.047 |
| 31    | 14.58     |                 | -6.745          | -26.53 | 0.269               | 12.5      |          | 5  | -478.927 | 968.5            | 1.92       | 0.041 |
| 45    | 35.04     |                 |                 | -23.23 | 0.245               |           | -2.961   | 4  | -480.089 | 968.6            | 2.03       | 0.038 |
| 14    | 29.05     | 0.166           |                 | -21.9  | 0.251               |           |          | 4  | -480.098 | 968.6            | 2.05       | 0.038 |
| 10    | 19.64     | 0.288           |                 |        | 0.271               |           |          | 3  | -481.288 | 968.8            | 2.25       | 0.034 |
| 30    | 3.326     | 0.284           |                 | -22.29 | 0.259               | 12.45     |          | 5  | -479.17  | 969              | 2.41       | 0.032 |
| 11    | 28.68     |                 | -2.723          |        | 0.276               |           |          | 3  | -481.408 | 969.1            | 2.49       | 0.03  |
| 41    | 28.38     |                 |                 |        | 0.268               |           | -1.784   | 3  | -481.453 | 969.2            | 2.58       | 0.029 |
| 26    | -5.637    | 0.405           |                 |        | 0.279               | 12.15     |          | 4  | -480.426 | 969.3            | 2.7        | 0.027 |

|    |        |       |        |        |       |       |          |   |          |       |       |       |
|----|--------|-------|--------|--------|-------|-------|----------|---|----------|-------|-------|-------|
| 61 | 14.68  |       |        | -23.92 | 0.253 | 11.18 | -1.721   | 5 | -479.328 | 969.3 | 2.73  | 0.027 |
| 27 | 8.844  |       | -3.726 |        | 0.285 | 11.17 |          | 4 | -480.664 | 969.8 | 3.18  | 0.022 |
| 48 | 44.07  | 0.216 | -21.76 | -34.11 | 0.267 |       | -21.19   | 6 | -478.423 | 969.8 | 3.18  | 0.022 |
| 64 | 16.67  | 0.350 | -22.73 | -34.75 | 0.278 | 13.19 | -20.4    | 7 | -477.37  | 970   | 3.4   | 0.019 |
| 57 | 8.989  |       |        |        | 0.275 | 10.55 | -0.5799  | 4 | -480.794 | 970   | 3.44  | 0.019 |
| 16 | 30.41  | 0.201 | -5.762 | -24.1  | 0.263 |       |          | 5 | -479.79  | 970.2 | 3.65  | 0.017 |
| 32 | 2.24   | 0.343 | -7.403 | -25.16 | 0.275 | 13.82 |          | 6 | -478.663 | 970.2 | 3.66  | 0.017 |
| 43 | 33.61  |       | -9.381 |        | 0.281 |       | -9.481   | 4 | -481.097 | 970.6 | 4.05  | 0.014 |
| 46 | 30.35  | 0.155 |        | -22.42 | 0.247 |       | -2.79    | 5 | -480.034 | 970.7 | 4.14  | 0.013 |
| 12 | 19.88  | 0.316 | -3.358 |        | 0.279 |       |          | 4 | -481.182 | 970.8 | 4.22  | 0.013 |
| 42 | 20.24  | 0.283 |        |        | 0.269 |       | -1.546   | 4 | -481.269 | 971   | 4.39  | 0.012 |
| 28 | -7.09  | 0.454 | -4.804 |        | 0.291 | 13.02 |          | 5 | -480.209 | 971.1 | 4.49  | 0.011 |
| 62 | 4.387  | 0.277 |        | -22.53 | 0.257 | 12.23 | -1.298   | 6 | -479.157 | 971.2 | 4.65  | 0.01  |
| 59 | 14.07  |       | -9.624 |        | 0.289 | 10.7  | -8.459   | 5 | -480.414 | 971.5 | 4.9   | 0.009 |
| 58 | -5.594 | 0.405 |        |        | 0.279 | 12.14 | -0.05854 | 5 | -480.426 | 971.5 | 4.92  | 0.009 |
| 44 | 24.32  | 0.345 | -10.54 |        | 0.285 |       | -10.14   | 5 | -480.827 | 972.3 | 5.72  | 0.006 |
| 60 | -2.192 | 0.476 | -11.26 |        | 0.296 | 12.6  | -9.188   | 6 | -479.913 | 972.7 | 6.16  | 0.005 |
| 5  | 46.42  |       |        | -31.34 |       |       |          | 2 | -485.985 | 976.1 | 9.52  | 0.001 |
| 21 | 30.14  |       |        | -32.25 |       | 9.276 |          | 3 | -485.512 | 977.3 | 10.7  | 0.001 |
| 37 | 48.33  |       |        | -32.14 |       |       | -6.758   | 3 | -485.641 | 977.5 | 10.96 | 0     |

|            |    |       |       |         |        |       |        |   |          |       |       |   |
|------------|----|-------|-------|---------|--------|-------|--------|---|----------|-------|-------|---|
|            | 6  | 44.7  | 0.059 |         | -31.06 |       |        | 3 | -485.978 | 978.2 | 11.63 | 0 |
|            | 7  | 46.49 |       | -0.1168 | -31.4  |       |        | 3 | -485.985 | 978.2 | 11.65 | 0 |
|            | 39 | 59.53 |       | -14.68  | -40.73 |       | -19.42 | 4 | -484.974 | 978.4 | 11.8  | 0 |
| Null model |    | 39.1  |       |         |        |       |        | 1 | -488.258 | 978.6 | 11.98 | 0 |
|            | 53 | 33.24 |       |         | -32.87 | 8.46  | -5.907 | 4 | -485.25  | 978.9 | 12.35 | 0 |
|            | 22 | 24.84 | 0.149 |         | -31.59 | 9.794 |        | 4 | -485.467 | 979.4 | 12.79 | 0 |
|            | 23 | 30.4  |       | -0.946  | -32.72 | 9.408 |        | 4 | -485.504 | 979.4 | 12.86 | 0 |
|            | 38 | 47.26 | 0.036 |         | -31.97 |       | -6.725 | 4 | -485.638 | 979.7 | 13.13 | 0 |
|            | 55 | 44.14 |       | -15     | -41.67 | 8.765 | -18.81 | 5 | -484.549 | 979.7 | 13.17 | 0 |
|            | 17 | 25.03 |       |         |        | 7.912 |        | 2 | -487.929 | 980   | 13.41 | 0 |
|            | 33 | 40.52 |       |         |        |       | -5.562 | 2 | -488.035 | 980.2 | 13.62 | 0 |
|            | 8  | 44.77 | 0.060 | -0.1919 | -31.15 |       |        | 4 | -485.978 | 980.4 | 13.81 | 0 |
|            | 3  | 37.56 |       | 3.786   |        |       |        | 2 | -488.132 | 980.4 | 13.81 | 0 |
|            | 2  | 32.73 | 0.225 |         |        |       |        | 2 | -488.156 | 980.4 | 13.86 | 0 |
|            | 40 | 57.52 | 0.071 | -14.8   | -40.45 |       | -19.45 | 5 | -484.963 | 980.6 | 14    | 0 |
|            | 54 | 28.84 | 0.122 |         | -32.32 | 8.903 | -5.75  | 5 | -485.221 | 981.1 | 14.51 | 0 |
|            | 24 | 24.88 | 0.158 | -1.195  | -32.15 | 9.988 |        | 5 | -485.455 | 981.6 | 14.98 | 0 |
|            | 18 | 14.19 | 0.312 |         |        | 9.049 |        | 3 | -487.739 | 981.7 | 15.16 | 0 |
|            | 49 | 27.48 |       |         |        | 7.225 | -4.812 | 3 | -487.763 | 981.8 | 15.2  | 0 |
|            | 56 | 38.48 | 0.162 | -15.28  | -41.09 | 9.36  | -18.84 | 6 | -484.496 | 981.9 | 15.33 | 0 |

|    |       |       |         |  |       |        |   |          |       |       |   |
|----|-------|-------|---------|--|-------|--------|---|----------|-------|-------|---|
| 19 | 24.39 |       | 3.254   |  | 7.527 |        | 3 | -487.836 | 981.9 | 15.35 | 0 |
| 34 | 34.51 | 0.211 |         |  |       | -5.404 | 3 | -487.945 | 982.1 | 15.57 | 0 |
| 35 | 40.6  |       | -0.1303 |  |       | -5.672 | 3 | -488.035 | 982.3 | 15.75 | 0 |
| 4  | 32.08 | 0.199 | 3.434   |  |       |        | 3 | -488.054 | 982.4 | 15.79 | 0 |
| 50 | 17.12 | 0.293 |         |  | 8.342 | -4.477 | 4 | -487.596 | 983.6 | 17.04 | 0 |
| 20 | 14.52 | 0.287 | 2.666   |  | 8.644 |        | 4 | -487.678 | 983.8 | 17.21 | 0 |
| 51 | 27.55 |       | -0.1129 |  | 7.225 | -4.907 | 4 | -487.763 | 984   | 17.38 | 0 |
| 36 | 34.87 | 0.215 | -0.7727 |  |       | -6.051 | 4 | -487.943 | 984.3 | 17.74 | 0 |
| 52 | 17.54 | 0.298 | -1.002  |  | 8.362 | -5.313 | 5 | -487.592 | 985.8 | 19.25 | 0 |

---



Table S4: Independent contribution (I) values for landscape and patch-level variables to taxonomic, functional and phylogenetic diversity of bird species recorded in 26 gallery forests of an Amazonian savanna landscape, Amapá, Brazil. Predictor variables in bold indicate that they are significantly related to the response variables (diversity dimension).

| Taxonomic Diversity               |                  |              |
|-----------------------------------|------------------|--------------|
|                                   | Observed I value | Z score      |
| Average vegetation height         | 0.72             | 0.10         |
| Canopy cover                      | 1.17             | 0.64         |
| Understory foliage density        | 2.23             | 1.62         |
| Forest area (%)                   | 1.54             | 1.09         |
| <b>Anthropogenic area (%)</b>     | <b>2.69</b>      | <b>-2.49</b> |
| Savanna area (%)                  | 1.68             | 1.32         |
| Forest width (m)                  | 0.18             | -0.52        |
| Functional Diversity              |                  |              |
| Average vegetation height         | 0.07             | -0.66        |
| Canopy cover                      | 0.87             | 0.35         |
| Understory foliage density        | 0.64             | -0.05        |
| <b>Forest area (%)</b>            | <b>2.43</b>      | <b>2.26</b>  |
| <b>Anthropogenic area (%)</b>     | <b>3.40</b>      | <b>-2.90</b> |
| <b>Savanna area (%)</b>           | <b>2.57</b>      | <b>2.23</b>  |
| Forest width (m)                  | 0.15             | -0.50        |
| Phylogenetic Diversity            |                  |              |
| Average vegetation height         | 0.11             | -0.63        |
| Canopy cover                      | 0.48             | -0.23        |
| <b>Understory foliage density</b> | <b>2.68</b>      | <b>-2.60</b> |
| <b>Forest area (%)</b>            | <b>2.41</b>      | <b>2.05</b>  |
| <b>Anthropogenic area (%)</b>     | <b>2.65</b>      | <b>-2.12</b> |
| <b>Savanna area (%)</b>           | <b>2.28</b>      | <b>2.15</b>  |
| Forest width (m)                  | 0.21             | -0.49        |
