# Supplementary material for: Composition, richness and nestedness of gallery forest bird assemblages in an Amazonian savanna landscape: lessons for conservation
Source: PeerJ. 2021 Dec 1;9:e12529. doi: 10.7717/peerj.12529 (PMC8643102; doi:10.7717/peerj.12529)
Supplement: Supplemental Information 1 [file peerj-09-12529-s001.xlsx]

## Sheet: Codes
Code	Title	Unity	Formula
TH	tree height	m
CC	canopy cover	%
UFD	understory foliage density	number of foliage hits in one plot

## Sheet: TH
sites	plot	TH
1	3	5.8
1	3	8.12577
1	3	7.30188
1	3	7.58634
1	3	7.15932
1	3	7.56717
1	3	7.26326
1	3	3.7
1	3	4.09
1	3	2.95
1	3	2.4
1	3	3.6
1	3	6
1	3	4.7
1	3	4.8
1	3	5.3
1	3	5.8
1	3	5.85
1	3	5.8
1	3	7.02785
1	3	4.3
1	3	4.6
1	3	4.6
1	3	6.8
1	3	9.05037
1	3	3.5
1	3	3.8
1	3	6.4
1	3	5.9
1	3	3.1
1	3	3.5
1	3	5.8
1	3	3.9
1	3	8.66666
1	3	5
1	3	4.7
1	3	5
1	3	7.46755
1	3	4.3
1	3	4.4
1	3	7.6167
1	3	7.6167
1	3	2.45
1	3	7.57163
1	3	7.75163
1	3	3
1	3	3.5
1	3	4.1
1	3	7.1
1	3	6.8
1	3	4
1	3	6.12
1	3	7.88594
1	3	3.2
1	3	4.3
1	3	3.7
1	3	3
1	3	2.8
1	3	7.25877
1	3	7.33355
1	3	5.8
1	3	4.4
1	3	7.23453
1	3	7.2
1	3	7.2
1	3	9.87215
1	3	9.09265
1	3	9.43111
1	3	7.97441
1	3	6.2
1	3	5.5
1	3	9.31737
1	3	10.0073
1	3	9.46846
1	3	9.46846
1	3	9.46846
1	3	8.71565
1	3	8.71565
1	3	3.5
1	3	8.44807
1	3	3.9
1	3	2.9
1	3	1.9
1	3	6.2
1	3	7.62
1	3	7.62
1	3	6.9
1	3	7
1	3	6.5
1	3	5
1	3	8.06874
1	3	7.47976
1	3	7.47976
1	3	6.8
1	3	6.8
1	3	6.8
1	3	4.7
1	3	5.2
1	3	4.5
1	3	3.5
1	3	6.96767
1	3	5.5
1	3	8.15229
1	3	2.7
1	3	3.8
1	3	3
1	3	8.63769
1	3	10.0546
1	3	4.8
1	3	5.4
1	3	10.7108
1	3	10.7108
1	3	11.8016
1	3	11.1822
1	3	11.1822
1	3	5.1
1	3	13.798
1	3	3.2
1	3	4
1	3	3.3
1	3	3.6
1	3	5.7
1	3	5.7
1	3	5.7
1	3	5.9
1	3	6.1
1	3	5.4
1	3	5
1	3	11.8508
1	3	3
1	3	4.1
1	3	10.0544
1	3	10.0544
1	3	10.0544
1	3	10.0544
1	3	7.86697
1	3	7.89409
1	3	4.9
1	3	4.6
1	3	4.6
1	3	4.4
1	3	9.64563
1	3	9.64563
1	3	2.1
1	3	2.8
1	3	2.8
1	3	10.3397
1	3	7.57163
1	3	7.57163
1	3	3
1	3	2.6
1	3	2.9
1	3	2.5
1	3	8.38207
1	3	6.2
1	3	5.3
1	3	2.25
1	3	5.1
1	3	4.4
1	3	3.5
1	3	6.4
1	3	2.6
1	3	3.5
1	3	4
1	3	5.4
1	3	4.2
1	3	5
1	3	4.9
1	3	2.15
1	3	3.5
1	3	5.5
1	3	5.1
1	3	4.9
1	3	8.14322
1	3	10.0546
1	3	5.8643
1	3	5
1	2	6.15
1	2	4
1	2	3
1	2	2.6
1	2	7.91615
1	2	7.91615
1	2	10.0051
1	2	5
1	2	2.7
1	2	8.87115
1	2	4.4
1	2	5.2
1	2	4.5
1	2	8.16753
1	2	2
1	2	3.2
1	2	5.4
1	2	5.4
1	2	5.1
1	2	4.4
1	2	6.94064
1	2	6.01973
1	2	6.01973
1	2	8.31845
1	2	6.5
1	2	4.5
1	2	7.24582
1	2	7.24582
1	2	7.24582
1	2	7.24582
1	2	7.75604
1	2	2.5
1	2	3.4
1	2	7.98482
1	2	7.98482
1	2	6.2
1	2	5
1	2	5
1	2	15.1213
1	2	9.66542
1	2	9.66542
1	2	9.66542
1	2	15.8117
1	2	1.6
1	2	12.2102
1	2	5.2
1	2	4.6
1	2	2.5
1	2	8.89836
1	2	6.9
1	2	14.9389
1	2	13.7622
1	2	5.1
1	2	12.3712
1	2	2.25
1	2	3.3
1	2	13.4423
1	2	13.8307
1	2	11.1426
1	2	5.4
1	2	3
1	2	5.2
1	2	11.4399
1	2	20.8012
1	2	7
1	2	7
1	2	7
1	2	10.5731
1	2	9.28752
1	2	6.9
1	2	4
1	2	2.5
1	2	8.46139
1	2	2.5
1	2	2.7
1	2	7.65763
1	2	7.65763
1	2	6.7
1	2	7.50575
1	2	7.34534
1	2	6.1
1	2	10.5779
1	2	6.3
1	2	6.3
1	2	5
1	2	11.1706
1	1	3.6
1	1	3.5
1	1	6.2
1	1	2.25
1	1	7
1	1	7
1	1	13.7031
1	1	11.2411
1	1	4.25
1	1	4.4
1	1	4.4
1	1	4
1	1	4
1	1	8.96184
1	1	8.96184
1	1	9.90825
1	1	9.72146
1	1	2.7
1	1	8.91314
1	1	6
1	1	5
1	1	6.8
1	1	5.2
1	1	5.1
1	1	8.6209
1	1	9.13335
1	1	7
1	1	7
1	1	2.1
1	1	4.2
1	1	1.7
1	1	2.4
1	1	5
1	1	5
1	1	5
1	1	10.6502
1	1	9.9593
1	1	3.5
1	1	6
1	1	6
1	1	8.20751
1	1	6.2
1	1	7.92497
1	1	8.4522
1	1	8.4522
1	1	9.93454
1	1	6.9
1	1	12.1132
1	1	5.1
1	1	3.5
1	1	6.97946
1	1	10.7886
1	1	10.7886
1	1	6.5
1	1	9.13335
1	1	3
1	1	5.9
1	1	4
1	1	4.2
1	1	3.1
1	1	4.4
1	1	4
1	1	5.1
1	1	4.25
1	1	4.1
1	1	6.49054
1	1	3.2
1	1	4
1	1	5.1
1	1	4.5
1	1	4.5
1	1	7.38555
1	1	3
1	1	7.53161
1	1	7.53161
1	1	7.53161
1	1	7.53161
1	1	11.2693
1	1	4.1
1	1	5
1	1	3.2
1	1	4
1	1	6.89288
1	1	6.89288
1	1	11.4063
1	1	7.24135
1	1	7.24135
1	1	5.4
1	1	6.3
1	1	3.8
1	1	7.98123
1	1	8.18821
1	1	5.5
1	1	5.8
1	1	3.5
1	1	7
1	1	4.5
1	1	4.6
1	1	3
1	1	2.5
1	1	4.1
1	1	2
1	1	10.5167
1	1	4.6
1	1	9.72888
1	1	5.6
1	1	9.62962
1	1	4
1	1	4
1	1	5.2
1	1	6.8
1	1	5.47
1	1	3.9
1	1	4.6
1	1	6.1
1	1	6.1
1	1	5.2
1	1	5.1
1	1	9.58513
1	1	3.5
1	1	5.45
1	1	3
1	1	4
1	1	9.05864
1	1	10.5228
1	1	10.7201
1	1	8.12558
1	1	3.7
1	1	9.86239
1	1	9.90425
1	1	11.5519
1	1	11.5519
1	1	7.65827
1	1	5.8
1	1	2
1	1	4
1	1	4.1
1	1	8.99766
1	1	8.53782
1	1	4.15
2	1	4.3
2	1	9.89181
2	1	4.6
2	1	4.2
2	1	4.2
2	1	4
2	1	4
2	1	6.2
2	1	6.4
2	1	6.3
2	1	6.81
2	1	4.31
2	1	4.5
2	1	6.85
2	1	6.86
2	1	6.88
2	1	6.6
2	1	4.28
2	1	6.3
2	1	4.96
2	1	4.9
2	1	4
2	1	4.25
2	1	5.01
2	1	3.52
2	1	3.4
2	1	4.42
2	1	4.54
2	1	4.85
2	1	4.83
2	1	5.1
2	1	5.3
2	1	3.09
2	1	4.06
2	1	1.75
2	1	4.53976
2	1	1.75
2	1	12.7997
2	1	4.04856
2	1	16.2341
2	1	6.51501
2	1	5.59033
2	1	6.12479
2	1	10.5605
2	1	5.52668
2	1	4.64715
2	1	4.4943
2	1	3.79128
2	1	4.07542
2	1	4.99554
2	1	10.0149
2	1	6.10195
2	1	3.22048
2	1	12.323
2	1	7.26128
2	1	11.1787
2	1	8.58793
2	1	6.00816
2	1	8.09252
2	1	8.91443
2	1	7.30259
2	1	13.6922
2	1	7.73104
2	1	16.3088
2	1	9.36219
2	1	6.64055
2	1	6.55364
2	1	14.7828
2	1	5.5
2	1	5.81
2	1	6.97
2	1	5.42982
2	1	5.32
2	1	8.65031
2	1	1.6
2	1	2.1
2	1	5.8
2	1	3
2	1	4.1
2	1	4.3
2	1	10.25
2	1	4.73
2	1	4.35
2	1	4.36
2	1	4.09
2	1	8.56
2	1	5.4
2	1	3.7
2	1	3
2	1	4
2	1	3.5
2	1	3.85
2	1	3.8
2	1	4
2	1	5
2	1	5.3
2	1	5.21
2	1	5.21
2	1	5.21
2	1	5.21
2	1	4
2	1	3.94
2	1	9.79
2	1	4.9
2	1	5.06
2	1	10.6175
2	1	5.97189
2	1	6
2	1	6
2	1	6
2	1	2.5
2	1	2.5
2	1	2.5
2	1	2.5
2	1	2.5
2	1	3.43855
2	1	2
2	1	3.5
2	1	3.5
2	1	1.5
2	1	3.54
2	1	3.54
2	1	4.19
2	1	4.53
2	1	5.92485
2	1	5.7839
2	1	4.7
2	1	4.17
2	1	10.7988
2	1	4.52
2	1	4.52
2	1	4.6
2	1	3.55
2	1	2.72759
2	1	2.72759
2	1	2.71486
2	1	2.72335
2	1	2.7191
2	1	3.7
2	1	6
2	1	6.2
2	1	6.35314
2	1	4.90564
2	1	9.07361
2	1	4.13
2	1	12.9326
2	1	5.3
2	1	5.35
2	1	5.4
2	1	5.33
2	1	4.18
2	1	4.18
2	1	4.09
2	1	3.94
2	1	4
2	1	3.91
2	1	3.94
2	1	3.97
2	1	4.28
2	1	3.9
2	1	3.04
2	1	3.43464
2	1	3.4538
2	1	4.33
2	1	4.22
2	1	4.22
2	1	4.19
2	1	2.5
2	1	4.61
2	1	9.40527
2	1	4.65696
2	1	4.31
2	1	4.38
2	1	3.8
2	1	3.33
2	1	3.72
2	1	3.9
2	1	3.56
2	1	2.45
2	1	15.7682
2	1	4.4463
2	1	1.7
2	1	4.4556
2	1	4.08984
2	1	10.734
2	1	9.59104
2	1	5.59495
2	1	4.78847
2	1	4.16383
2	1	5.66217
2	1	7.319
2	1	4.37993
2	1	4.76355
2	1	6.7165
2	1	3.87518
2	1	6.96103
2	1	2.25095
2	1	3.73451
2	1	3.73451
2	1	2.1
2	1	3.88691
2	1	4.65688
2	1	5.70515
2	1	7.70602
2	1	4.69973
2	1	7.31725
2	1	1.5
2	1	3
2	1	5.85922
2	1	5.85922
2	1	7.29104
2	1	1.53
2	1	2.1
2	1	6.47733
2	1	4.88324
2	1	6.29463
2	1	2.5
2	3	2
2	3	5.92148
2	3	12.3234
2	3	11.0606
2	3	4.36128
2	3	7.56744
2	3	10.8148
2	3	7.4376
2	3	7.4376
2	3	12.2631
2	3	2.74
2	3	8.56483
2	3	8.56483
2	3	8.56483
2	3	8.56483
2	3	11.4697
2	3	1.8
2	3	2.18588
2	3	8.96
2	3	8.96
2	3	8.96
2	3	6
2	3	6
2	3	3.78935
2	3	6.40294
2	3	6.40294
2	3	6.40294
2	3	6.40294
2	3	2.2
2	3	14.6247
2	3	3.59539
2	3	1.94
2	3	1.49
2	3	4.31057
2	3	4.73193
2	3	6.0594
2	3	5.07741
2	3	5.07741
2	3	7.80907
2	3	7.80907
2	3	3.2
2	3	5.18794
2	3	2.5
2	3	6.34718
2	3	7.93545
2	3	7.93545
2	3	2.22997
2	3	5.19119
2	3	3.9
2	3	4
2	3	4.14
2	3	4.19736
2	3	2.68087
2	3	4.65933
2	3	3.66093
2	3	5.1981
2	3	6.30027
2	3	3.59539
2	3	9.35267
2	3	3
2	3	7.72649
2	3	7.60617
2	3	2.87131
2	3	8.3609
2	3	3
2	3	7.56128
2	3	4.7
2	3	4.72
2	3	5.74117
2	3	4.65688
2	3	2.7
2	3	1.8
2	3	4.6932
2	3	3.81108
2	3	3.81108
2	3	3.81108
2	3	4.3
2	3	7.03037
2	3	3.87504
2	3	3.87504
2	3	3.87504
2	3	4.12518
2	3	5.32205
2	3	5.32205
2	3	5.32205
2	3	5.32205
2	3	5.32205
2	3	4.4
2	3	4.4
2	3	4.78723
2	3	4.8809
2	3	4.66264
2	3	2.47148
2	3	4.50985
2	3	3.5
2	3	3.5
2	3	3.5
2	3	3.5
2	3	3.5
2	3	4.53392
2	3	6.62711
2	3	6.62711
2	3	8.39042
2	3	4.03851
2	3	2.5
2	3	6
2	3	4.4
2	3	2.8
2	3	5.63298
2	3	5.63298
2	3	8.12109
2	3	5.45011
2	3	4.0902
2	3	4.5
2	3	4.95906
2	3	7.70602
2	3	7.70602
2	3	7.70602
2	3	7.70602
2	3	5.91445
2	3	5.91445
2	3	5.91445
2	3	3.3
2	3	3.4
2	3	7.108
2	3	7.108
2	3	7.108
2	3	7.108
2	3	7.108
2	3	2.4
2	3	4.97545
2	3	4.97545
2	3	4.4
2	3	4.4
2	3	3.9
2	3	5.6
2	3	4.45
2	3	4.45
2	3	4.3
2	3	4.35
2	3	4.35
2	3	4.35
2	3	4.35
2	3	4.15
2	3	4.15
2	3	4.15
2	3	4.15
2	3	2.3
2	3	6.66796
2	3	6.66796
2	3	6.66796
2	3	6.66796
2	3	6.66796
2	3	6.66796
2	3	3
2	3	2.6
2	3	5.48558
2	3	2.65232
2	3	2.6
2	3	2.5
2	3	2.5
2	3	5.07741
2	3	5.7749
2	3	3.3
2	3	4.19509
2	3	4.25
2	3	4.25
2	3	4.25
2	3	3.9
2	3	4.5
2	3	4.45
2	3	5.1
2	3	3
2	3	3.8
2	3	3.7
2	3	3.8
2	3	6.01865
2	3	4.55
2	3	1.9
2	3	5.48558
2	3	4.1
2	3	4.1
2	3	4.1
2	3	4.1
2	3	5.35
2	3	5.35
2	3	5.35
2	3	5.35
2	3	2.1
2	3	4.5
2	3	4.973
2	3	5.40648
2	3	4.95906
2	3	5.0641
2	3	3.3
2	3	3.3
2	3	3.3
2	3	7.23961
2	3	9.92418
2	3	4.3126
2	3	2.05631
2	3	5.2
2	3	4
2	3	4
2	3	4.3
2	3	4.3
2	3	4.3
2	3	7.23961
2	3	7.23961
2	3	4.5
2	3	5
2	3	4.6
2	3	3.75
2	2	4.55
2	2	4.3
2	2	4.66
2	2	3.8
2	2	4.2
2	2	3.65
2	2	7.74537
2	2	6
2	2	3.3
2	2	2.5
2	2	2.5
2	2	2.5
2	2	3.7
2	2	3.2
2	2	2.65
2	2	7.23961
2	2	7.23961
2	2	7.23961
2	2	6.9
2	2	6.9
2	2	6.9
2	2	6.9
2	2	5.69061
2	2	5.69061
2	2	2.75
2	2	2.6
2	2	5.22
2	2	4.2964
2	2	1.42
2	2	4.66768
2	2	4.66768
2	2	4.66768
2	2	4.66768
2	2	4.66768
2	2	9.04014
2	2	9.55768
2	2	9.55768
2	2	9.55768
2	2	9.55768
2	2	3.25
2	2	3.25
2	2	3.25
2	2	3.25
2	2	1.95
2	2	7.16986
2	2	3.1
2	2	2.5
2	2	4.34
2	2	5.14768
2	2	5.25
2	2	6
2	2	6
2	2	8.13171
2	2	2.55
2	2	3.15
2	2	3.6
2	2	4.45
2	2	3.8
2	2	3.1
2	2	3.05
2	2	2
2	2	4.25
2	2	3.3
2	2	3.3
2	2	4.6
2	2	3.8
2	2	9.76713
2	2	9.76713
2	2	3.85
2	2	3.3
2	2	3.9
2	2	3.02
2	2	4.65
2	2	4.4
2	2	3.45
2	2	5.98596
2	2	13.0201
2	2	3.48
2	2	5.05
2	2	3.78
2	2	4.21
2	2	5.3
2	2	3.01
2	2	5.15
2	2	9.40527
2	2	3.15
2	2	3.13
2	2	6.29463
2	2	5.32205
2	2	3.76
2	2	3.1
2	2	2.8
2	2	13.3516
2	2	5.59964
2	2	7.23961
2	2	5.1
2	2	2.5
2	2	2.8
2	2	2.5
2	2	1.95
2	2	4.9
2	2	13.3516
2	2	13.3516
2	2	4.53392
2	2	1.55
2	2	1.5
2	2	1.6
2	2	6.51429
2	2	3.15
2	2	4.35
2	2	4
2	2	3.93
2	2	4.41
2	2	3.05
2	2	2.75
2	2	3.61
2	2	5.0641
2	2	3.07
2	2	3.07
2	2	1.72
2	2	6.71576
2	2	4.7
2	2	4.46
2	2	4.47
2	2	6.29482
2	2	3.66351
2	2	5.46
2	2	3.75
2	2	3
2	2	3.3
2	2	3.1
2	2	2.5
2	2	3.05
2	2	2.7
2	2	3.64
2	2	3.98
2	2	2.83821
2	2	3.93
2	2	2.65
2	2	4.7
2	2	3.57
2	2	3
2	2	2.45
2	2	1.65
2	2	4.68
2	2	4.68
2	2	4.3
2	2	4.68
2	2	3
2	2	4.3
2	2	4.3
2	2	4.3
2	2	5.23
2	2	4.35
2	2	8.10272
2	2	3
2	2	3.56
2	2	3.73
2	2	9.01526
2	2	6
2	2	3.5
2	2	8.5
2	2	9.83243
2	2	3.5
2	2	5.5
2	2	5.7
2	2	6
2	2	12.0522
2	2	5.4
2	2	5.7
2	2	3.8
2	2	1.5
2	2	5.52
2	2	5.1
2	2	4.5
2	2	2.5
2	2	2.5
2	2	2
2	2	4.5
2	2	3
2	2	7.47783
2	2	7.47783
2	2	6
2	2	4.86
2	2	6.5
2	2	4.8
2	2	4.7
2	2	2.5
2	2	2.5
2	2	4.8
2	2	6.3
2	2	6.8
2	2	4.9
2	2	2
2	2	8.32811
2	2	3.2
2	2	7.47783
2	2	3
2	2	4
2	2	4
3	3	3.91
3	3	15.2135
3	3	3.1
3	3	5.5
3	3	4.68
3	3	3
3	3	2.8
3	3	14.6601
3	3	5.6
3	3	2.7
3	3	3
3	3	3.6
3	3	3
3	3	3.1
3	3	4.1
3	3	4.5
3	3	4
3	3	3
3	3	2.55
3	3	3.15
3	3	5
3	3	10.9791
3	3	3.5
3	3	3
3	3	6
3	3	5
3	3	3.3
3	3	14.4037
3	3	5.6
3	3	3.6
3	3	2.8
3	3	2.5
3	3	14.7451
3	3	6.6
3	3	6.6
3	3	6.5
3	3	3
3	3	3.35
3	3	3
3	3	2.6
3	3	2.3
3	3	3.9
3	3	2.7
3	3	6.8
3	3	2.75
3	3	4.5
3	3	4.6
3	3	10.0491
3	3	6.3
3	3	2.1
3	3	2.3
3	3	5.5
3	3	5.5
3	3	14.1279
3	3	6.7
3	3	6.8
3	3	6.8
3	3	6.8
3	3	2.2
3	3	6.4
3	3	5.7
3	3	5.7
3	3	6.8
3	3	8.73048
3	3	8.33922
3	3	8.81746
3	3	6.2
3	3	4.5
3	3	4.5
3	3	3.5
3	3	3.8
3	3	2.1
3	3	2.1
3	3	5.83
3	3	10.9142
3	3	8.96011
3	3	2.6
3	3	8.70136
3	3	8.70136
3	3	8.70136
3	3	8.70136
3	3	8.66666
3	2	14.1548
3	2	16.6029
3	2	4.1
3	2	3.5
3	2	5
3	2	5
3	2	5
3	2	4
3	2	1.6
3	2	2.6
3	2	3.5
3	2	5
3	2	3.5
3	2	2.7
3	2	5.2
3	2	6.6
3	2	15.8878
3	2	4.1
3	2	4.1
3	2	4.6
3	2	2.1
3	2	3.49
3	2	2.6
3	2	10.0577
3	2	3
3	2	8.4995
3	2	3.5
3	2	2.4
3	2	2.6
3	2	3
3	2	3.8
3	2	2.3
3	2	2.1
3	2	2
3	2	2.8
3	2	2.4
3	2	6.91592
3	2	9.57983
3	2	6.2
3	2	8.0317
3	2	4.7
3	2	4.85
3	2	4.81
3	2	4.62226
3	2	2.3
3	2	1.7
3	2	6.5
3	2	6
3	2	4.5
3	2	9.88658
3	2	8.68521
3	2	4
3	2	5.5
3	2	4.7
3	2	4
3	2	1.65
3	2	13.8168
3	2	3.3
3	2	4
3	2	4
3	2	3.5
3	2	2.6
3	2	1.6
3	2	3.5
3	2	4
3	2	4.6
3	2	2.5
3	2	2.8
3	2	4.2
3	2	5
3	2	8.38896
3	2	2.6
3	2	7.1
3	2	7.1
3	2	9.95298
3	2	4
3	2	4
3	2	10.578
3	2	1.7
3	2	3
3	2	3
3	1	4.4
3	1	5
3	1	4
3	1	2.1
3	1	7.53741
3	1	6.4
3	1	2.6
3	1	11.0104
3	1	10.8871
3	1	8.78035
3	1	3.5
3	1	3.95
3	1	3.5
3	1	2.5
3	1	4
3	1	7.88156
3	1	1.5
3	1	3
3	1	3.5
3	1	7.1
3	1	4
3	1	10.9199
3	1	8.83017
3	1	9.4824
3	1	11.6252
3	1	3.2
3	1	2.6
3	1	4.55
3	1	3.05
3	1	8.82563
3	1	7.66226
3	1	3
3	1	7.75163
3	1	2.6
3	1	2.6
3	1	2.7
3	1	7
3	1	7.5
3	1	6.8
3	1	3.7
3	1	4.45
3	1	11.0192
3	1	2.75
3	1	3.3
3	1	2.5
3	1	1.73
3	1	6.9
3	1	3.7
3	1	3.55
3	1	12.6994
3	1	4.2
3	1	3
3	1	4.15
3	1	4.6
3	1	4.6
3	1	4
3	1	6.7
3	1	5.3
3	1	4.25
3	1	3.5
3	1	6.95936
3	1	3.5
3	1	2.2
3	1	4.55
3	1	2.5
3	1	2.8
3	1	2.8
3	1	19.4558
3	1	6
3	1	4
3	1	3.5
3	1	2.2
3	1	6.3
3	1	3.1
3	1	6.52
3	1	6.5
3	1	3.3
3	1	7.97991
3	1	6.87275
3	1	6.23
3	1	6.23
3	1	14.9336
3	1	5.52
3	1	6.4
3	1	4.3
3	1	4.1
3	1	4.1
3	1	4.4
3	1	10.1412
3	1	1.72
3	1	7
3	1	1.85
3	1	2.6
3	1	4.5
3	1	2.6
3	1	4
3	1	3.5
3	1	3.2
25	3	3.9
25	3	5.5
25	3	5.75
25	3	10.3804
25	3	9.65918
25	3	3.75
25	3	10.8629
25	3	9.74677
25	3	11.8508
25	3	5.8
25	3	3.2
25	3	4.68
25	3	4.5
25	3	9.96087
25	3	11.4162
25	3	3.7
25	3	11.2946
25	3	4.05
25	3	5.6
25	3	10.1645
25	3	12.0836
25	3	3.1
25	3	12.5833
25	3	4.7
25	3	4.7
25	3	4.8
25	3	4.7
25	3	2.5
25	3	4.6
25	3	6.72
25	3	10.5518
25	3	9.63934
25	3	9.86978
25	3	10.3933
25	3	8.79946
25	3	9.76072
25	3	4
25	3	4.7
25	3	6.6
25	3	3.2
25	3	8.68139
25	3	4.8
25	3	4.8
25	3	4.8
25	3	4.6
25	3	4
25	3	4.85
25	3	9.69
25	3	2.5
25	3	9.51214
25	3	9.0596
25	3	9.04891
25	3	8.82829
25	3	1.5
25	3	2.6
25	3	8.35275
25	3	8.35275
25	3	5.6
25	3	7.9423
25	3	5
25	3	4
25	3	3
25	3	8.89778
25	3	5.3
25	3	10.09
25	3	3.05
25	3	2.8
25	3	4.8
25	3	6.4
25	3	3.45
25	3	2
25	3	10.5986
25	3	2.6
25	3	5.71
25	3	4
25	3	3.3
25	3	2.4
25	3	8.06527
25	3	3.7
25	3	4.5
25	3	8.82203
25	3	11.9952
25	3	11.4764
25	3	1.7
25	3	2.5
25	3	4.8
25	3	5.83
25	3	6.88
25	3	2.95
25	3	2.1
25	3	4.47
25	3	5.6
25	3	3.13
25	3	7.3
25	3	22.3393
25	3	5.94
25	3	3
25	3	6.9
25	3	9.09
25	3	4
25	3	2
25	3	2.6
25	3	7
25	3	3.4
25	3	2.3
25	3	4.5
25	3	6.3
25	3	3.8
25	3	7.1
25	3	5.3
25	3	4.5
25	3	3.5
25	3	3.5
25	3	2.4
25	3	5.5
25	3	8.14322
25	3	4.7
25	3	4.72
25	3	18.3491
25	3	4.26
25	3	2.7
25	3	3.33
25	3	2.4
25	3	6.8
25	3	17.862
25	3	4.6
25	3	4.7
25	3	4.6
25	3	6.35
25	3	3.2
25	3	4.02
25	3	8.96184
25	3	8.83444
25	3	4.9
25	3	15.6363
25	3	3
25	3	5
25	3	7.61472
25	3	3.5
25	3	3.5
25	3	3.5
25	3	3.5
25	3	13.4773
25	3	3
25	3	3
25	3	11.9183
25	2	8.41059
25	2	10.0434
25	2	7.2
25	2	2.25
25	2	3
25	2	1.8
25	2	3.2
25	2	3.3
25	2	4.2
25	2	11.5519
25	2	4.6
25	2	3.9
25	2	2.9
25	2	11.0909
25	2	2.6
25	2	2.6
25	2	1.45
25	2	3.5
25	2	4
25	2	8.56336
25	2	11.1535
25	2	2.4
25	2	2.2
25	2	5.1
25	2	6.8
25	2	6.8
25	2	8.06527
25	2	1.35
25	2	7
25	2	14.7864
25	2	6
25	2	2.3
25	2	6.4
25	2	1.62
25	2	8.93514
25	2	1.75
25	2	2
25	2	2.2
25	2	6.72
25	2	2.4
25	2	4.3
25	2	10.1302
25	2	7
25	2	7
25	2	2
25	2	4.6
25	2	7
25	2	2.4
25	2	9.3
25	2	9.5
25	2	3.6
25	2	5.9
25	2	8.2
25	2	7.5
25	2	7.5
25	2	4
25	2	8
25	2	22.5
25	2	4.2
25	2	3.25
25	2	7
25	2	4.7
25	2	4.7
25	2	9.8
25	2	3.14
25	2	3.4
25	2	7.35
25	2	7.35
25	2	7.35
25	2	2.3
25	2	1.8
25	2	1.66
25	2	1.77
25	2	1.9
25	2	2.6
25	2	2.9
25	2	6.95
25	2	2.3
25	2	2.3
25	2	18
25	2	12
25	2	18.5
25	2	3
25	2	3
25	2	4.6
25	2	2.8
25	2	2.2
25	2	25
25	2	6
25	2	3.6
25	2	6.68
25	2	10
25	2	8.7
25	2	24
25	1	2.8
25	1	7.1
25	1	6.1
25	1	3.15
25	1	4.3
25	1	3
25	1	10
25	1	6.9
25	1	3.5
25	1	10.0997
25	1	8.5
25	1	8
25	1	7.8
25	1	9
25	1	2.6
25	1	10
25	1	2.05
25	1	4.8
25	1	12
25	1	4
25	1	2.5
25	1	6.65
25	1	11.5155
25	1	11.5155
25	1	5.8
25	1	12.3496
25	1	1.4
25	1	2.3
25	1	2.8
25	1	5.9
25	1	4.3
25	1	12.5481
25	1	9.87215
25	1	12.508
25	1	12.508
25	1	7.2
25	1	16.4053
25	1	3
25	1	2
25	1	6.82
25	1	7.6
25	1	4
25	1	5
25	1	5
25	1	6.4
25	1	4
25	1	4.5
25	1	4.6
25	1	3.9
25	1	1.5
25	1	1.48
25	1	5.15
25	1	10.9869
25	1	4.56
25	1	3.59
25	1	4.6
25	1	4
25	1	2.8
25	1	2.15
25	1	1.42
25	1	4.8
25	1	4
25	1	2.7
25	1	2.5
25	1	2.55593
25	1	2.58756
25	1	4
25	1	2.25
25	1	3.55
25	1	2.1
25	1	1.65
25	1	4.6
25	1	4
25	1	2.53
5	3	3
5	3	11.4063
5	3	2.5
5	3	2
5	3	3.12
5	3	5
5	3	12.5632
5	3	3.6
5	3	2.6
5	3	4.5
5	3	6.9
5	3	5.2
5	3	3.7
5	3	3.5
5	3	3
5	3	3.3
5	3	5.7
5	3	11.5763
5	3	3
5	3	3.2
5	3	6.12
5	3	7.7
5	3	4.89
5	3	3
5	3	7
5	3	7.2
5	3	5.93
5	3	5.5
5	3	4.96
5	3	4
5	3	4.57
5	3	4
5	3	3.59
5	3	6.75
5	3	12.5297
5	3	8.7
5	3	8.7
5	3	8.35
5	3	8.35
5	3	11.5656
5	3	11.5656
5	3	3.5
5	3	2.8
5	3	3.5
5	3	5.5
5	3	7
5	3	3.3
5	3	8.1
5	3	6.42
5	3	5.52
5	3	3.2
5	3	8
5	3	8
5	3	8
5	3	8
5	3	4.8
5	3	6.8
5	3	7.12
5	3	4
5	3	3.5
5	3	8.25
5	3	5.45
5	3	5.45
5	3	5.45
5	3	5.45
5	3	5.45
5	3	5.45
5	3	7
5	3	6.8
5	3	2.7
5	3	7.5
5	3	11.5885
5	3	5
5	3	7.2
5	3	7.2
5	3	5.3
5	3	3.5
5	3	6.2
5	3	8.5
5	3	7.8
5	3	7.6
5	3	11.4381
5	3	11.5519
5	3	2
5	3	4.2
5	3	6.4
5	3	4.1
5	3	8
5	3	9
5	3	9
5	3	2.7
5	3	3.8
5	3	7.9
5	3	5.7
5	3	5.7
5	3	8.8
5	3	3
5	3	6
5	3	11.153
5	3	11.153
5	3	11.153
5	3	6.9
5	3	3
5	3	6.3
5	3	6.3
5	3	6.3
5	3	6.15
5	3	4.86
5	3	5.95
5	3	2.7
5	3	3.5
5	3	4
5	3	7
5	3	7
5	3	5.5
5	3	4
5	3	5.13
5	3	4.6
5	3	5.9
5	3	3
5	3	2.9
5	3	4.5
5	3	2
5	3	7.9
5	3	4
5	3	4.55
5	3	5.5
5	3	3.05
5	3	3.4
5	3	6.5
5	3	5.4
5	3	3.6
5	3	2.4
5	3	4.8
5	3	4.1
5	3	6.4
5	3	6
5	3	5.8
5	3	2.6
5	3	2.7
5	3	4.45
5	3	3
5	3	5.5
5	3	5.5
5	3	5.5
5	3	3.2
5	3	4.4
5	3	5.7
5	3	4
5	3	7
5	3	7.5
5	3	5.9
5	3	7.2
5	3	7.2
5	3	4
5	3	4
5	3	7.25
5	3	7.22
5	3	5.9
5	3	3
5	3	7
5	3	6.5
5	3	4.6
5	3	6.5
5	3	7.15
5	3	5.8
5	3	6.2
5	3	8.4
5	3	3.2
5	3	5.05
5	3	2.6
5	3	3.8
5	3	4
5	3	9.5
5	3	5.5
5	3	2.5
5	3	8.3
5	3	1.7
5	3	2.6
5	3	2.6
5	3	4.5
5	3	7.6
5	3	5.3
5	3	5.3
5	3	5.6
5	3	6.8
5	3	6.8
5	3	3.2
5	3	5.2
5	3	5.5
5	3	5.54
5	3	5.54
5	3	5.4
5	3	6.4
5	3	7
5	3	6.6
5	3	8.5
5	3	5.8
5	3	2
5	3	4.2
5	3	6.6
5	3	3.65
5	3	6.9
5	3	7
5	2	3.6
5	2	3.6
5	2	6.2
5	2	6.2
5	2	4.6
5	2	4.6
5	2	5.15
5	2	3
5	2	2
5	2	1.35
5	2	7.6
5	2	7.6
5	2	2.2
5	2	4.5
5	2	4.2
5	2	6.42
5	2	2.8
5	2	4
5	2	2
5	2	8
5	2	9.5
5	2	4.5
5	2	9.6
5	2	2.9
5	2	9.8
5	2	4.63
5	2	3.55
5	2	8.4
5	2	3.2
5	2	2.5
5	2	2.6
5	2	8.5
5	2	7.8
5	2	6
5	2	4.1
5	2	2.5
5	2	3.7
5	2	4
5	2	2.7
5	2	7.7
5	2	3.7
5	2	3.7
5	2	6.4
5	2	8.96
5	2	1.6
5	2	7
5	2	5.9
5	2	11.5839
5	2	6.3
5	2	2.2
5	2	3.2
5	2	4.2
5	2	4.9
5	2	6
5	2	10.5001
5	2	2.5
5	2	6
5	2	4.66
5	2	4
5	2	12.0516
5	2	4
5	2	8.2
5	2	9.1
5	2	8.9
5	2	4.57
5	2	1.99
5	2	4.2
5	2	5.3
5	2	2.1
5	2	3.4
5	2	3.5
5	2	3.5
5	2	3.5
5	2	11.5352
5	2	2.88
5	2	3.6
5	2	13.5827
5	2	4
5	2	7.4
5	2	4.3
5	2	4.8
5	2	3.4
5	2	2.2
5	2	3.3
5	2	3.4
5	2	1.35
5	2	4.6
5	2	7.6
5	2	7.6
5	2	4
5	2	11.5656
5	2	11.5656
5	2	6.5
5	2	2.3
5	2	2.7
5	2	5.6
5	2	4
5	2	5.4
5	1	5.8
5	1	2.5
5	1	4
5	1	3.6
5	1	3.2
5	1	4.15
5	1	4.6
5	1	5.2
5	1	4.2
5	1	2.2
5	1	5.4
5	1	2
5	1	4.8
5	1	14.2783
5	1	14.2783
5	1	14.2783
5	1	1.4
5	1	8.6
5	1	1.7
5	1	5.92
5	1	5.92
5	1	2.8
5	1	3.5
5	1	3.6
5	1	7.9
5	1	7.9
5	1	3
5	1	6.5
5	1	6.5
5	1	6.2
5	1	6.2
5	1	11.3715
5	1	5
5	1	5
5	1	5.7
5	1	4.5
5	1	2.2
5	1	3.4
5	1	11.3715
5	1	6.3
5	1	6.3
5	1	8.9
5	1	8.9
5	1	2.5
5	1	6.9
5	1	5.9
5	1	6.4
5	1	6.5
5	1	11.2026
5	1	7
5	1	3
5	1	3
5	1	4.93
5	1	6
5	1	7
5	1	11.3337
5	1	5.7
5	1	5.89
5	1	5.89
5	1	4
5	1	7.65
5	1	7.65
5	1	7.7
5	1	3
5	1	11.5839
5	1	6.8
5	1	5.2
5	1	7.1
5	1	4
5	1	4.4
5	1	3.3
5	1	2.1
5	1	5.4
5	1	4
5	1	3.5
5	1	6.03
5	1	6.03
5	1	6.7
5	1	7.7
5	1	7.7
5	1	6.3
5	1	10.5777
5	1	3.2
5	1	4
5	1	11.5885
5	1	11.5885
5	1	11.5885
5	1	11.5885
5	1	9.5
[truncated: 6,383 more rows]

## Sheet: CC
sites	plot	CC
1	3	62.88
1	3	53.93
1	3	44.31
1	3	43.6
1	2	42.75
1	2	49.91
1	2	40.64
1	2	43.69
1	1	41.1
1	1	44.16
1	1	42.85
1	1	44.59
2	1	60.36
2	1	59.73
2	1	60.17
2	1	58.82
2	3	59.59
2	3	58.56
2	3	58.44
2	3	56.46
2	2	49.28
2	2	44.44
2	2	58.63
2	2	41.29
3	3	38.94
3	3	39.21
3	3	40.43
3	3	41.45
3	2	64.33
3	2	46.6
3	2	43.89
3	2	44.2
3	1	48.02
3	1	51.39
3	1	52.52
3	1	72.99
25	3	42.11
25	3	49.01
25	3	47.7
25	3	41.37
25	2	43.35
25	2	41.47
25	2	40.45
25	2	43.53
25	1	46.19
25	1	46.65
25	1	46.75
25	1	47.6
5	3	47.9
5	3	46.03
5	3	65.05
5	3	83.14
5	2	68.02
5	2	47.75
5	2	44.69
5	2	42.41
5	1	62
5	1	46.46
5	1	69.51
5	1	43.49
4	3	64.73
4	3	40.57
4	3	64.97
4	3	51.18
4	2	55.08
4	2	48.1
4	2	40.74
4	2	42.16
4	1	41.58
4	1	38.97
4	1	39.68
4	1	48.15
11	3	42.31
11	3	41.94
11	3	62.66
11	3	71.11
11	2	41.42
11	2	68.73
11	2	42.04
11	2	68.15
11	1	38.71
11	1	39.35
11	1	41.78
11	1	36.34
6	3	58.48
6	3	60.15
6	3	60.49
6	3	58.53
6	2	63.87
6	2	59.72
6	2	64.72
6	2	47.1
6	1	59.81
6	1	62.7
6	1	24.79
6	1	73.45
7	3	39.29
7	3	46.66
7	3	44.51
7	3	44.19
7	2	48.57
7	2	42.91
7	2	45.02
7	2	45.89
7	1	51.66
7	1	52.26
7	1	50.42
7	1	56.03
8	3	51.64
8	3	38.27
8	3	49.16
8	3	43.54
8	2	48.29
8	2	49.17
8	2	41.6
8	2	40.98
8	1	38.72
8	1	38.54
8	1	38.03
8	1	37.75
9	1	46.91
9	1	50.82
9	1	38.27
9	1	40.42
9	3	40.06
9	3	47.3
9	3	44.08
9	3	48.08
9	2	43.24
9	2	42.84
9	2	41.13
9	2	41.02
21	3	67.37
21	3	41.68
21	3	40.16
21	3	43.02
21	2	36.89
21	2	45.58
21	2	47.9
21	2	42.29
21	1	26.49
21	1	46.56
21	1	42.16
21	1	43.21
22	3	44.87
22	3	44.38
22	3	53.14
22	3	42.44
22	2	49.71
22	2	41.17
22	2	50.1
22	2	59.39
22	1	46.81
22	1	49.1
22	1	42.07
22	1	44.42
10	3	44.14
10	3	51.47
10	3	40.84
10	3	42.54
10	2	49.23
10	2	48.63
10	2	43.99
10	2	46.87
10	1	47.34
10	1	43.06
10	1	52.3
10	1	42.94
15	3	44.05
15	3	44.61
15	3	45.57
15	3	42.15
15	2	42.24
15	2	41.83
15	2	47.3
15	2	40.24
15	1	52.07
15	1	44.24
15	1	52.41
15	1	41.7
18	1	47.6533
18	1	40.38
18	1	57.76
18	1	44.82
18	2	44.71
18	2	41.1
18	2	40.96
18	2	42.26
18	3	61
18	3	70.62
18	3	66.85
18	3	66.16
13	3	42.38
13	3	39.14
13	3	44.64
13	3	47.09
13	2	48.16
13	2	43.19
13	2	55.59
13	2	54.73
13	1	46.11
13	1	51.58
13	1	47.42
13	1	50.61
16	3	41.87
16	3	41.67
16	3	44.58
16	3	44.51
16	2	39.97
16	2	46.91
16	2	40.28
16	2	36.36
16	1	47
16	1	43.52
16	1	43.31
16	1	46.14
12	3	46.07
12	3	40.28
12	3	45.87
12	3	35.59
12	2	38.03
12	2	38.14
12	2	37.68
12	2	39.05
12	1	37.42
12	1	50.15
12	1	47.37
12	1	38.17
14	3	66.64
14	3	47.25
14	3	44.46
14	3	43.87
14	2	50.65
14	2	45.95
14	2	38.71
14	2	41.78
14	1	36.34
14	1	42.65
14	1	39.99
14	1	40.22
17	3	51.2
17	3	47.49
17	3	42.27
17	3	50.1
17	2	45.6
17	2	42.3
17	2	54.38
17	2	48.11
17	1	70.49
17	1	65.47
17	1	67.59
17	1	52.65
24	3	55.25
24	3	42.86
24	3	40.7
24	3	43.1
24	2	42.4
24	2	41.78
24	2	45.73
24	2	41.94
24	1	38.65
24	1	41.02
24	1	49.69
24	1	45.18
23	3	43.55
23	3	38.8
23	3	42.43
23	3	48.64
23	2	46.54
23	2	43.91
23	2	45.1
23	2	51.42
23	1	41.85
23	1	40.93
23	1	41.55
23	1	45.09
26	1	67.11
26	1	39.77
26	1	42.28
26	1	55.09
26	3	45.66
26	3	41.63
26	3	36.48
26	3	45.95
26	2	41.82
26	2	43.44
26	2	41.22
26	2	38.03
20	3	54.29
20	3	49.46
20	3	47.5
20	3	51.36
20	2	48.43
20	2	47.45
20	2	49.99
20	2	38.68
20	1	67.29
20	1	48.44
20	1	47.04
20	1	11.78
19	3	37.2
19	3	30.14
19	3	43.62
19	3	40.45
19	2	43.69
19	2	40.9
19	2	42.25
19	2	40.09
19	1	53.22
19	1	45.65
19	1	49.13
19	1	35.83

## Sheet: UFD
sites	plot	UFD
1	1	383
1	2	365
1	3	256
2	1	171
2	2	233
2	3	220
3	1	567
3	2	429
3	3	510
4	1	430
4	2	366
4	3	423
5	1	210
5	2	344
5	3	232
6	1	595
6	2	210
6	3	196
7	1	248
7	2	244
7	3	287
8	1	171
8	2	307
8	3	309
9	1	314
9	2	207
9	3	304
10	1	227
10	2	218
10	3	473
11	1	627
11	2	433
11	3	399
12	1	244
12	2	427
12	3	501
13	1	203
13	2	240
13	3	166
14	1	331
14	2	221
14	3	200
15	1	407
15	2	228
15	3	232
16	1	528
16	2	200
16	3	209
17	1	197
17	2	256
17	3	298
18	1	315
18	2	245
18	3	498
19	1	341
19	2	326
19	3	472
20	1	486
20	2	290
20	3	373
21	1	364
21	2	277
21	3	262
22	1	293
22	2	261
22	3	288
23	1	237
23	2	246
23	3	181
24	1	446
24	2	419
24	3	301
25	1	238
25	2	308
25	3	288
26	1	253
26	2	259
26	3	197
