# Supplementary material for: Composition, richness and nestedness of gallery forest bird assemblages in an Amazonian savanna landscape: lessons for conservation
Source: PeerJ. 2021 Dec 1;9:e12529. doi: 10.7717/peerj.12529 (PMC8643102; doi:10.7717/peerj.12529)
Supplement: Supplemental Information 3 [file peerj-09-12529-s003.xlsx]

## Sheet: Raw Data
Species	Distance from forest edge (distance classes)
	0-50	50-100	100-150	150-200	200-250	250-300	300-350	350-400	weighted_average
Amazilia fimbriata	4	2	0	1	2	0	0	0	97.2222
Arremon taciturnus	0	0	0	0	0	0	0	0	0
Attila cinnamomeus	1	0	0	0	0	0	0	0	25
Attila spadiceus	1	0	1	0	0	0	0	0	75
Berlepschia rikeri	0	0	0	0	0	0	0	0	0
Bucco tamatia	3	0	0	0	0	0	0	0	25
Cacicus cela	3	1	1	0	0	0	0	0	55
Campephilus melanoleucos	3	0	0	1	0	0	0	0	62.5
Campephilus rubricollis	0	0	0	0	0	0	0	0	0
Cantorchilus leucotis	10	0	0	0	0	0	0	0	25
Celeus flavus	0	0	0	0	0	0	0	0	0
Cercomacroides tyrannina	4	0	0	0	0	0	0	0	25
Chiroxiphia pareola	5	0	0	0	0	0	0	0	25
Chlorestes notata	3	0	0	0	0	0	0	0	25
Coccycua minuta	1	0	0	0	1	0	0	0	125
Coereba flaveola	22	5	2	1	3	0	0	1	70.5882
Conirostrum speciosum	0	0	0	1	0	0	0	0	175
Crypturellus erythropus	0	0	0	0	0	0	0	0	0
Crypturellus soui	1	0	0	0	0	0	0	0	25
Cyanerpes cyaneus	0	0	0	0	0	0	0	0	0
Cyclarhis gujanensis	19	3	1	2	0	0	1	0	57.6923
Dacnis cayana	4	1	0	1	0	0	0	0	58.3333
Dendrexetastes rufigula	0	0	0	0	0	0	0	0	0
Dendrocincla fuliginosa	0	0	0	0	0	0	0	0	0
Dendrocolaptes certhia	0	0	0	0	0	0	0	0	0
Dendrocolaptes picumnus	0	0	0	0	0	0	0	0	0
Dendroplex picus	5	0	0	0	1	1	0	0	89.2857
Dryobates passerinus	1	0	0	0	0	0	0	1	200
Dryocopus lineatus	4	0	0	1	1	1	0	1	143.75
Elaenia flavogaster	17	7	8	7	3	1	1	4	123.958
Empidonomus varius	3	0	1	0	0	0	0	0	50
Euphonia chlorotica	7	1	1	0	0	0	0	0	41.6667
Euphonia violacea	7	1	1	1	1	1	0	0	87.5
Formicivora grisea	6	0	0	0	0	1	0	0	60.7143
Galbula galbula	5	0	0	0	0	0	0	0	25
Glyphorynchus spirurus	2	0	0	0	0	0	0	0	25
Hemithraupis guira	1	0	0	0	0	0	0	0	25
Herpsilochmus sticturus	0	0	0	0	0	0	0	0	0
Hylophilus pectoralis	5	1	1	0	0	0	0	0	46.4286
Icterus cayanensis	1	0	0	0	0	0	0	0	25
Legatus leucophaius	2	0	0	0	0	0	0	0	25
Lepidocolaptes albolineatus	0	0	0	0	0	0	0	0	0
Leptotila rufaxilla	2	0	0	0	0	1	0	0	108.333
Leptotila verreauxi	3	0	0	1	0	0	0	0	62.5
Lophotriccus galeatus	8	1	0	0	0	0	0	0	30.5556
Manacus manacus	1	0	0	0	0	0	0	0	25
Megarynchus pitangua	7	0	2	0	1	0	0	0	65
Momotus momota	0	0	0	0	0	0	0	0	0
Myiarchus ferox	4	0	2	1	0	3	0	0	135
Myiarchus tyrannulus	13	5	4	7	2	4	1	4	145
Myiopagis flavivertex	1	0	0	0	0	0	0	0	25
Myiopagis gaimardii	18	2	0	0	1	0	0	1	54.5455
Myiozetetes cayanensis	2	2	0	0	0	0	0	0	50
Myrmeciza longipes	4	0	0	0	0	0	0	0	25
Myrmoderus ferrugineus	0	0	0	0	0	0	0	0	0
Myrmophylax atrothorax	0	0	0	0	0	0	0	0	0
Myrmotherula axillaris	0	0	0	0	0	0	0	0	0
Nasica longirostris									0
Nemosia pileata	1	2	1	0	0	0	0	0	75
Notharchus tectus	1	0	0	0	0	0	0	0	25
Ortalis motmot	5	0	0	0	0	0	0	0	25
Pachyramphus polychopterus	11	0	1	0	0	0	1	0	55.7692
Patagioenas cayennensis	15	7	7	2	4	3	4	11	175
Patagioenas speciosa	2	0	0	0	0	0	0	0	25
Percnostola rufifrons	1	0	0	0	0	0	0	0	25
Phaethornis ruber	5	0	0	0	0	0	0	0	25
Pheugopedius coraya	0	0	0	0	0	0	0	0	0
Piaya cayana	7	3	1	1	0	0	0	0	58.3333
Picumnus cirratus	1	0	0	0	0	0	0	0	25
Pipra aureola	7	0	0	0	0	0	0	0	25
Polioptila plumbea	24	5	1	2	0	1	2	1	76.3889
Psarocolius viridis	1	0	0	0	0	0	0	0	25
Querula purpurata	0	0	0	0	0	0	0	0	0
Ramphocelus carbo	4	1	0	1	0	0	0	0	58.3333
Rhytipterna simplex	2	0	0	0	0	0	0	0	25
Sclateria naevia	1	0	0	0	0	0	0	0	25
Tangara mexicana	4	0	0	0	1	0	0	0	65
Taraba major	0	0	0	0	0	0	0	0	0
Thamnophilus doliatus	4	0	0	1	0	0	0	0	55
Thamnophilus punctatus	5	0	0	0	0	0	0	0	25
Thraupis episcopus	8	5	0	3	2	0	0	0	86.1111
Thraupis palmarum	8	4	2	0	2	2	0	0	97.2222
Tinamus major	0	0	0	0	0	0	0	0	0
Tityra semifasciata	0	0	0	0	0	0	0	0	0
Todirostrum cinereum	4	2	0	0	0	0	0	0	41.6667
Todirostrum maculatum	1	0	0	0	0	0	0	0	25
Todirostrum pictum	1	0	0	0	0	0	0	0	25
Tolmomyias flaviventris	16	2	0	0	0	0	0	1	48.6842
Tolmomyias poliocephalus	2	0	0	0	0	0	0	0	25
Trogon violaceus	1	0	0	0	0	0	0	0	25
Trogon viridis	5	0	0	1	0	0	0	0	50
Turdus leucomelas	11	2	1	0	1	1	0	0	65.625
Turdus nudigenis	0	0	0	0	0	0	0	0	0
Tyrannopsis sulphurea	2	0	0	0	0	0	0	0	25
Tyrannulus elatus	1	0	0	0	0	0	0	0	25
Vireo chivi	10	1	0	0	0	0	0	0	29.5455
Xenops minutus	0	0	0	0	0	0	0	0	0
Xiphorhynchus guttatus	3	0	0	0	0	0	0	0	25
Xiphorhynchus obsoletus	0	0	0	0	0	0	0	0	0
